# Supplementary material for: Aerosol absorption retrieval at ultraviolet wavelengths in acomplex environment
Source: Copernicus journal article supplement (doi:10.5194/amt-2016-273), 2016-08-26
Supplement: Supplementary file [file amt-2016-273-AC1-supplement.pdf]

We would like to thank the reviewer for the comments and recommendations.

We apologize for the fact that the uploaded version was not the absolute final. Due to that, there were several points mostly related with the AAE figure not showed and figure 13 that are not correct and have been revised through the reviewer's suggestions.

In this document we have included the original questions and recommendations in italics and our responses.

General comments

*One is the interpretation of Figure 5. When the 15 degree solar zenith angle data point is excluded then there is an obvious trend of AERONET-UVMFR differences of AOD that range from +0.02 to -0.01 as a function of solar zenith angle from 20 to 65 degrees, while the authors suggest there is no trend (page 12, lines 8-12). This suggests that the cosine response error in the UVMFR may not be fully accounted for, since the AERONET direct sun measurement of AOD with a narrow field of view does not have any solar zenith angle tendency.*

We have included the following sentence in the manuscript:

“An AOD, SZA dependent trend, in the order of 0.02 (if excluding the 15° SZA bin) can be observed which could be attributed to ETC determination uncertainty or non ideal correction for the cosine response error of the UVMFR.”

However, since we are mainly interested on the possible effects of the different AODs in the SSA retrievals from both UVMFR and CIMEL, we tried to investigate this effect.

So we used the radiative transfer code for the SSA-UVMFR retrieval with inputs:

- a. UVMFR derived AODs at 368nm and 332nm
- b. The synchronous AERONET (interpolated to 368nm and extrapolated at 332nm) AODs.

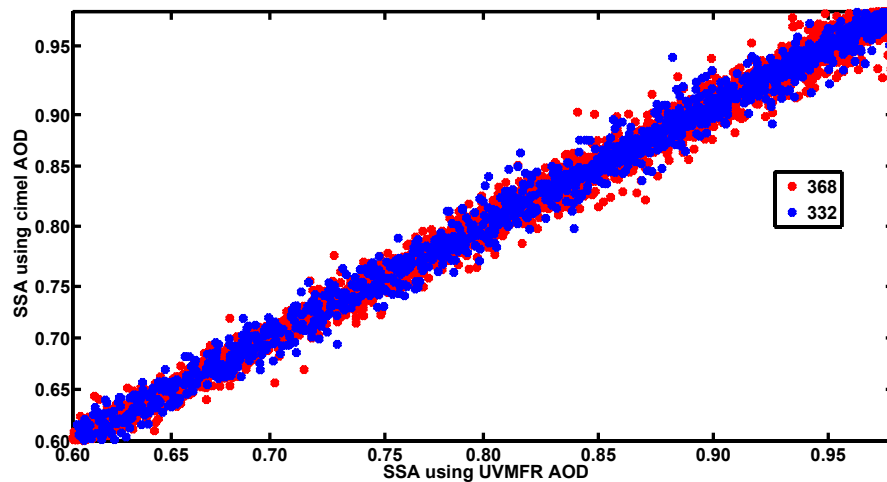

Figure: SSA retrieval at 332nm and 368nm using the UVMFR AODs (XX' axis) and the CIMEL AODs (YY' axis)

The results show the low impact of the AOD differences in the retrieved UVMFR SSAs, even including calibration and UVMFR angular correction related uncertainties plus the uncertainties connected with the interpolation/extrapolation of the CIMEL AOD wavelengths to the UVMFR ones.

***Page 2, lines 25-28: The authors suggest that AERONET almucantar retrievals are only for the visible (VIS) part of the spectrum. This is not true as the wavelengths that are input to the retrieval algorithm include two near-infrared wavelengths (870 and 1020 nm) in addition to two visible wavelengths (440 and 675 nm). Therefore the term “VIS-SSA” on line 28 is somewhat misleading.***

The error has been corrected in this paragraph, and at all other parts of the text, to include both visible and near infrared regions of spectrum when referring to the almucantar retrievals.

***Page 3, line 1: The word ‘weaker’ seems to be a poor choice of vocabulary here, perhaps ‘difficult’ would be better?***

The sentence has been restated.

***Page 3, line 5: Please include the fact that measurement accuracy is even more important here than measurement precision.***

Accuracy is way more important than precision for our retrieval and the sentence has been restated.

***Page 3, line 5: Please note that the UV fraction of the energy in the total solar spectrum is very small and therefore it is not very important for radiative forcing estimates.***

Comment was mentioned in the text

***Page 3: Please include some mention in the introduction section of the satellite retrievals of SSA in the UV wavelengths as has been published in several papers by Omar Torres (GSFC). Include at least one Torres reference in this discussion.***

Two sentences has been added on the aspect of SSA satellite retrieval in the UV and a O. Torres overview of OMI retrievals has been referred:

“Torres et al., (2007), in an overview study of OMI aerosols products, summarized the algorithmical techniques of SSA satellite retrieval at 388nm, which uses spectral variability between 354nm and 388nm , 388nm reflectance and a selection on the aerosol type. They compared to AERONET SSA at 440nm and found a root mean square error of 0.03.”

***Page 5, line 18: Please include “mid-visible” before SSA in this sentence.***

It has been changed in reviewed manuscript.

***Page 6, line 4: Note that aerosol SSA cannot be much lower than 0.2 due to particle diffraction effects***

The sentences were changed to:

“Theoretically SSA values range from 0 (totally absorbing aerosols) to 1 (totally scattering aerosol). Actual SSA values in the atmosphere can be found in the range of 0.6 to 1.”

***Page 6, line 15-17: Note that Eck et al. (2003) also applied this approach to VIS-NIR wavelengths.***

A reference to this work has been added.

***Page 7, line 25: Change ‘constructing company’ to ‘manufacturer’***

The sentence has been restated.

***Page 8, line 15-16: Please give references here for the range of SSA, particularly for values as low as 0.5. This lower limit seems extreme to me.***

We provided the Corr et al., 2009 reference reporting values from 0.6 to 1 and changed the limits. However AERONET L1.5 data can be found down to 0.5. But since they are related with low AODs can be considered highly uncertain.

***Page 9, line 28: Please include the reference of Smirnov et al. (2000) for the AERONET cloud screening.***

Reference included.

**Page 12, Figure 4:** Figure 4 is hard to read due to extreme compression of the y-axis and very small font for labels. The figure is also confusing since it implies an AOD of 1.5 from the UVMFR when the Cimel would measure only 1.0. The plots therefore appear to be inconsistent with the linear fit equations which have a slope of very close to 1.0. Please explain this apparent discrepancy.

The figure axis were corrected. Fit equations were actually correct. Figure was re-shaped in order to be easier to read. We have revised the figure as follows:

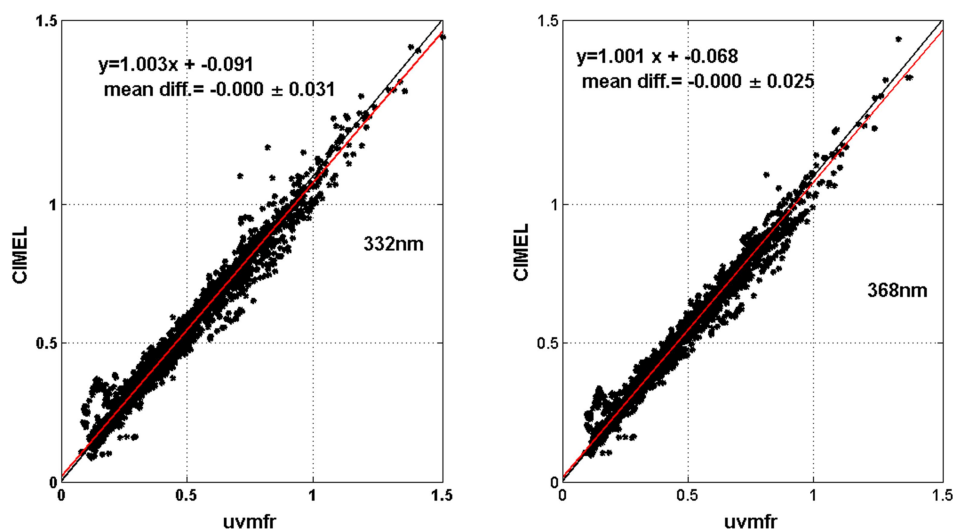

Figure: Comparison of CIMEL and UVMFR retrieved AODs for synchronous measurements for 332 nm (left panel) and 368 nm (right panel).

**Page 12, line 9:** Figure 4 should be Figure 5 here.

Corrected

**Page 13, Figure 5:** I assume that the 15-degree solar zenith angle has less observations than the other bins in Figure 5. It would be useful to show the number of data points that are included in each SZA interval bin.

The bar plot above shows data sampled in each bin. The 15° bin has less points but ~7000 data points is still a statistically large collection of data.

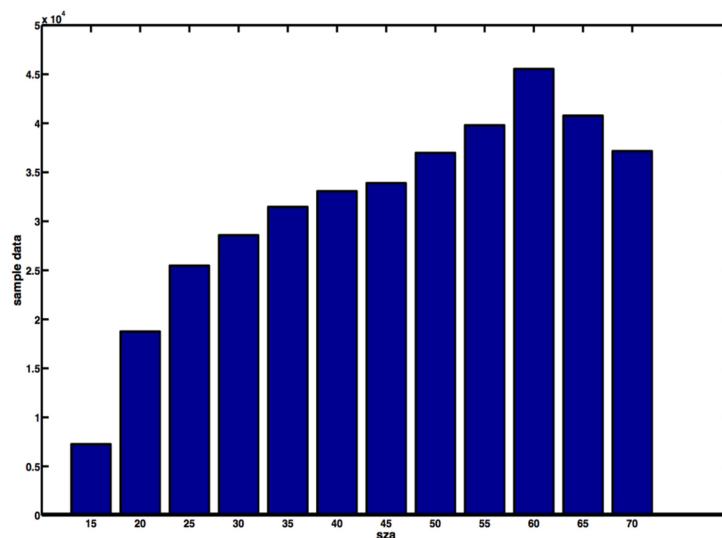

Figure: Number of data per SZA bin

***Page 13, line 6: Please be clear that AERONET uses satellite derived climatological values for both ozone and NO<sub>2</sub>.***

The sentence has been restated.

***Page 13, line 17-18: However, this plot (Figure 6 right panel) suggests a cutoff of <65 degrees SZA for retrievals due since sensitivity decreases rapidly as SZA increases.***

Yes we agree that is why we have used measurements for solar zenith angles lower than 70 degrees in this work.

***Page 15, line 10-11: Please note here that you have also applied the SZA restriction of >50 degrees, as shown in Figure 10 (on page 18). Also please note that the uncertainty in SSA from AERONET increases rapidly as AOD decreases, with uncertainty of 0.03 at AOD (440 nm)=0.5, see Dubovik et al. (2000; Table 4). Did you apply a minimum value of AOD to the AERONET and UVMFR retrievals of SSA shown in this paper? The errors in SSA for the UVMFR shown in Figure 7 become very large at low AOD***

The enhanced cimel derived, dataset we used is as described the L1.5, with the added criterion, that L2 size distribution is available. So there are data below 50°. In our calculations we did not filter data due to low AOD. Obviously measurements at very low AODs, have high uncertainty at SSA retrieval, as shown in figure 7, and it is visible at figure 11 were SSA values for low AODs are largely scattered. However, for all comparisons with AERONET measurements (figures 12, 14) these measurements are filtered, as it cannot pass the criterion for enhanced L1.5 inversion retrievals, and only synchronous to those UVMFR are used for these statistics. We have added the sentence: ‘We have to note that since no restriction has been introduce for UVMFR SSA retrievals at low AOD’s the SSA uncertainty related with these data becomes larger as seen also in figure 7.’

**Page 16, Figure 8 caption: Please change ‘the visible range’ to ‘at 440 nm’.**

It has been changed.

**Page 16, line 23-24: I suggest also plotting the monthly mean AOD values to see if there is a relationship to the SSA retrievals.**

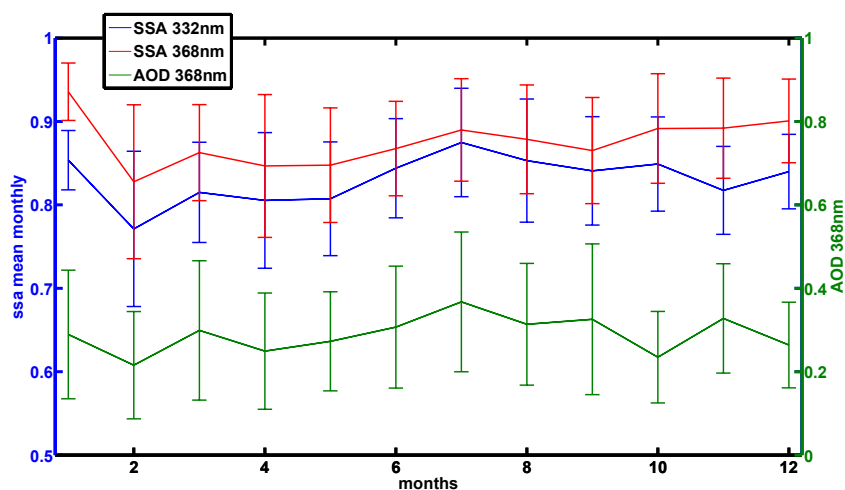

We have added the monthly mean AOD on top of the SSA monthly means.

Sentence added: “Looking at the monthly mean AODs; despite the fact that standard deviations of both SSA and AOD’s are large, it can be seen that higher AOD’s are associated with less absorbing aerosol cases.”

**Page 17, line 18-20: These should not be called error bars if they denote variability of SSA in each month. These 1-sigma values are likely due to both variation in aerosol properties and retrieval uncertainty. Please add a sentence to clarify this.**

The text has been changed to:

“However, the statistical one standard deviation bars are quite large. These bars describe the variability of the SSA’s during each hourly bin, but also include the retrieval uncertainty.”

**Page 18, Figure 10: Figure 10 shows the annual average diurnal variability. How does the diurnal variation change seasonally?**

Analyzing different seasons, there is no evidence that the pattern changes for different seasons. Differences are well within the statistical standard deviation bars. Having a look at the SZA dependence of the SSA at 368nm and 332nm it does not seem to have any clear dependence too.

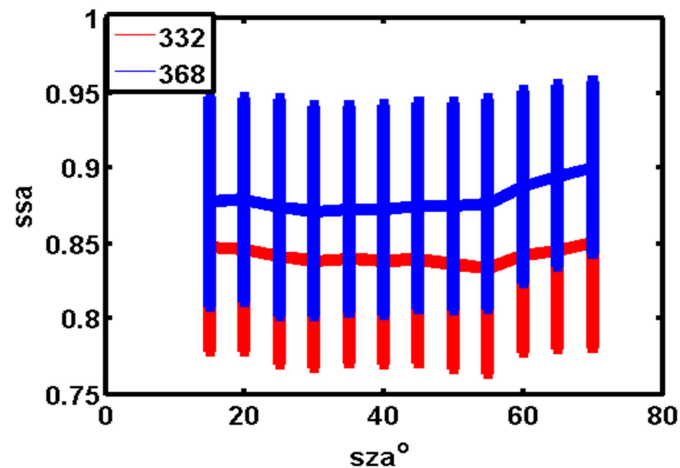

Figure: SSA at 332 nm and 368 nm and 1 standard deviations for 5 degree SZA bins

**Page 18, Line 15: Please specify in the text the magnitude here for “higher AOD”. Do you mean >0.4 at 440 nm?**

A threshold value of 0.6 has been added to the manuscript to clarify the sentence

**Page 18, Line 15-17: This is a very confusing sentence about AERONET spectral dependence of SSA. Please rewrite or clarify this.**

The sentence has been revised.

**Page 18, Line 18: “at Washington” should be “near Washington, DC”. Remember there is a Washington state on the west coast of the USA.**

Corrected: “CIMEL retrievals show an almost constant value of the SSA  $\sim 0.92$ , while lower values have been retrieved at smaller AODs. Similar results were reported by [Krotkov et al. \(2005b\)](#) when analyzing measurements derived at at AERONET calibration site in Greenbelt, Maryland USA.”

**Page 20, Figure 12: Please use larger fonts for the labeling of Figure 12, it is currently very hard to read.**

Font size has been changed.

**Page 20, Lines 9-11: What are the AOD levels for these low SSA cases with values <0.75? Are these very low SSA values from L1.5 or L2 retrievals? Please include this information in the text.**

The 0.7 value refers to the Angstrom Exponent and not the SSA. All values in this paragraph refers to differences among 440nm and 368nm.

**Page 20, Lines 15-21: “Russel et al (2010)” should be “Russell et al (2010)”**

Done

**Page 21, Lines 2: I think that Figure 11 should be Figure 12 here.**

Corrected

**Page 21, Lines 8: I think that Figure 12 should be Figure 13 here.**

Corrected

**Page 21, Figure 13: There is no fine and coarse mode information given in the figure 13 although the text suggests it does have this information. Why are the January and December months missing in Figure 13.**

We have revised the figure, including the original one in this manuscript version.

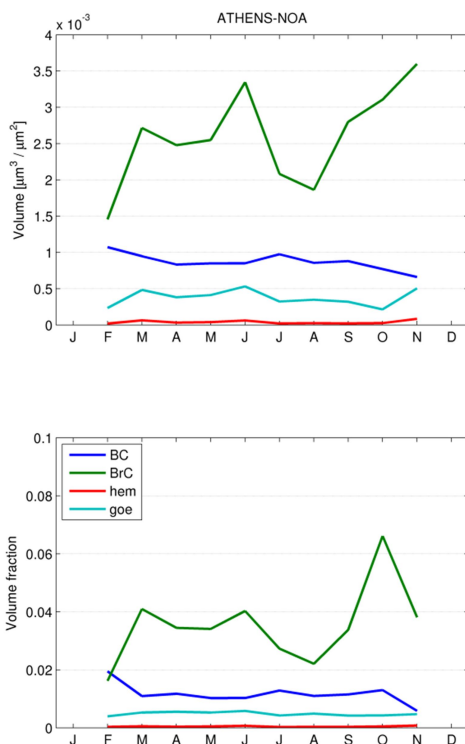

The reason for January/December having no data is related to two thresholds applied here. Only data when  $\text{AOD}@440\text{nm} \geq 0.2$  was included and additionally only months when there was at least 10 retrievals. Both had influence that these two months got excluded, e.g. in December there were only three cases of retrievals with AOD larger than 0.2.

**Page 22, Lines 1-4: Why only scattering and not extinction for the AE?**

Corrected to aerosol extinction



**Page 22, Lines 10-11:** *The Figure showing the temporal variability of AAE is missing from the review manuscript. This suggests poor quality checking of the manuscript by the authors.*

We apologize for that. For some reason not the absolute final version of the paper has been uploaded. Due to that, there are several points related with the AAE figure not showing here and the figure 13 that are not correct and have been revised through the reviewer's suggestions.

**Page 23, Figure 14:** *I suggest adding a fourth category to this plot :  $AE > 1.2$  to see the spectral SSA variation of fine mode cases.*

We have included similar data for  $AE > 1.2$  as suggested.

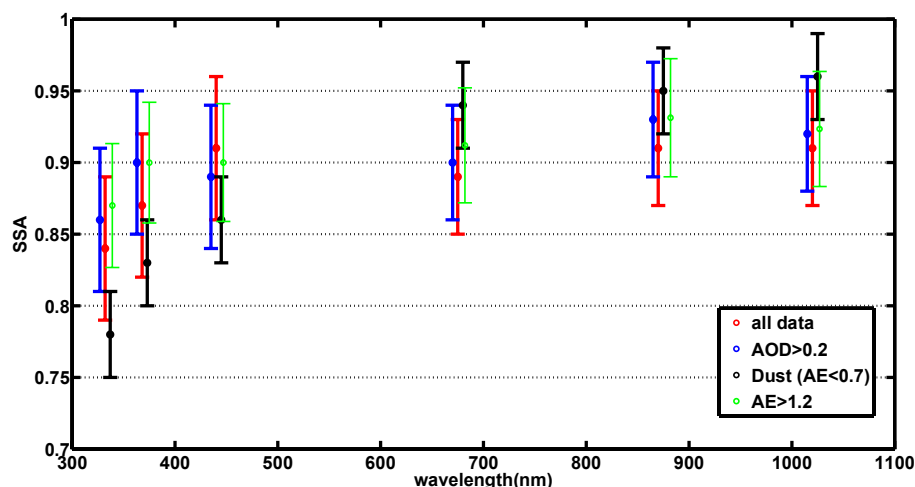

Figure: Wavelength dependence of SSA from synchronous CIMEL and UVMFR measurements. Blue points represent all data points, red data retrievals with  $AOD > 0.2$ , green points data with  $AE > 1.2$  and black data only dust aerosol cases. Vertical bars represent 1 standard deviation of the calculated mean.

Comment added: "Fine mode cases show smaller spectral dependence ( $SSA_{440nm} - SSA_{332nm} < 0.03$ )."

**Page 24, Line 20:** *What is a satellite post-correction validation result? What do you mean by post-correction?*

We added the Arola et al., 2009 reference. We mean that satellite products like OMI satellite related solar UV has been proven that have to be corrected for absorbing aerosols. So as post-correction we mean a factor that has been applied on the satellite results. We have erased the word validation from this sentence as it is wrong.

**Page 25, Line 1-3:** *It does not make any sense to me to compare this data to retrievals made in Washington DC without any further explanation. There is very little dust aerosol in Washington DC and therefore it would be expected for these two sites to differ significantly.*

**We write:**

The extended SSA dataset ...provides additional information on the effect of varying background aerosol conditions and higher aerosol absorption, than that provided by Washington, DC, where dust aerosol cases are very rare.

So we are just mentioning that the dataset used here provides information on partly different aerosol conditions than the ones in Washington DC. There are a lot of days with similar aerosol conditions for the two cities, but also others associated with dust aerosol intrusions that enhance our understanding for SSA@UV wavelengths on such conditions.

|

# Aerosol absorption retrieval at ultraviolet wavelengths in a complex environment

S. Kazadzis<sup>1,2</sup>, P.I. Raptis<sup>2</sup>, N. Kouremeti<sup>1</sup>, V. Amiridis<sup>3</sup>, A. Arola<sup>4</sup>, E. Gerasopoulos<sup>2</sup>, G.L. Schuster<sup>5</sup>

[1]{Physikalisch-Meteorologisches Observatorium Davos, World Radiation Center (PMOD/WRC) Dorfstrasse 33, CH-7260 Davos Dorf, Switzerland}

[2] {Institute of Environmental Research and Sustainable Development, National Observatory of Athens, Greece}

[3]{Institute of Astronomy Astrophysics, Space Applications and Remote Sensing, National Observatory of Athens, Greece}

[4] {Finnish Meteorological Institute, Kuopio Unit, Finland}

[5] {NASA Langley Research Center, Hampton, VA, USA}

Correspondence to: stelios.kazadzis@pmodwrc.ch

## Abstract

We have used total and diffuse UV irradiance measurements with a multi-filter rotating shadow-band radiometer (UVMFR), in order to calculate aerosol absorption ~~properties~~ property (Single Scattering Albedo - SSA) in the UV range, for a ~~5-5~~-years period in Athens, Greece. This data set was used as input to a radiative transfer model and the SSA for 368nm and 332nm has been calculated. Retrievals from a collocated CIMEL sun-photometer were used to validate the products and study absorption spectral behavior of retrieved SSA values at these wavelengths. UVMFR SSA together with synchronous, CIMEL-derived, retrievals at 440nm, show a mean of 0.90, 0.87 and 0.83, with lowest values (higher absorption) towards ~~lower-shorter~~ wavelengths. In addition, noticeable diurnal variations of the SSA in all wavelengths are revealed, with amplitudes in up to 0.05. ~~High-Strong~~ SSA wavelength dependence is found for cases of low Ångström exponents and also an SSA decrease with decreasing extinction optical depth, suggesting an effect of the different aerosol composition.

1 However, part of this dependence, for low aerosol optical depths, is masked by the increased  
2 SSA retrieval uncertainty. Dust and Brown Carbon UV absorbing properties were  
3 investigated to understand-explain seasonal variability of the results.

## 5 **1 Introduction**

6 The role of aerosols, both natural and anthropogenic, is extremely important for regional and  
7 global climate change studies as well as for overall pollution mitigation strategies (e.g., IPCC,  
8 2013). However, a considerable amount of work still needs to be carried out as aerosols have  
9 an impact at local, regional and global climate scales.~~However, a considerable amount of~~  
10 ~~work still needs to be carried out, particularly as it appears that climate change is accelerating,~~  
11 ~~with aerosols impacting at local, regional and global scales.~~ Furthermore, the components  
12 controlling aerosol forcing, account for the largest uncertainties in relation to anthropogenic  
13 climate change (IPCC, 2007, IPCC, 2013<sup>4</sup>). A comprehensive review of the assessment of  
14 the aerosol direct effect, its state of play as well as outstanding issues, is given by (IPCC,  
15 2013<sup>4</sup>) and (Yu et al., 2006). Both emphasize that ~~the~~ significant aerosol absorption  
16 uncertainties in modeled global Single Scattering Albedo (SSA) estimationsretrievals,  
17 constitute one of the largest single source of uncertainty in current modeling estimates  
18 rateestimates of aerosol climate forcing. SSA is the ratio of scattering to total extinction  
19 (scattering plus absorption), and it depends strongly on chemical composition, particle size,  
20 mixturemixing state, relative humidity and wavelength. Comprehensive measurements are  
21 crucial to understand their effects and to reduce SSA uncertainties that propagate into aerosol  
22 radiative forcing estimates. For example for the same aerosol load (aerosol optical depth), the  
23 absorbing nature of aerosols can lead to up to 50% change-decrease in the erythermal  
24 irradiance, compared to only scattering aerosols (Bais et al., 2014). SSA calculated here  
25 differs from in situ SSA values retrieved from absorption and scattering measurements at a  
26 single altitude level (e.g., at the ground). Columnar SSA, ~~in that it is a~~ columnar  
27 measurement, arising from solar irradiance attenuationattenuation along a fixed irradiance  
28 path-transfer in the atmosphere.

29 In the visible (VIS) and in the near infrared (NIR) parts of the spectrum, advanced retrieval  
30 algorithms for microphysical aerosol properties have been developed in the framework of the  
31 Aerosol Robotic Network (AERONET) and the Skyradiometer Network (SKYNET) (e.g.,  
32 Dubovik and King, 2000; Nakajima et al., 1996). All AERONET stations currently provide

inversion based [column average SSA retrievals at the visible and near IR wavelengths \(i.e., 440nm, 670nm, 870nm, 1020nm\)](#) VIS-SSA retrievals. In addition, surface direct and diffuse irradiances had been used to derive spectral AOD and SSA at visible and UV wavelengths (King and Herman 1979; King 1979; Petters et al., 2003; Eck et al., 1998; Krotkov et al., 2005b; Bais et al., 2005; Goering et al., 2005; Taylor et al., 2008; Kudo et al., 2008; Corr et al., 2009). ~~In addition, Goering et al. (2005), Taylor et al. (2008) and Kudo et al. (2008) have proposed estimation techniques for the retrieval of spectral aerosol optical properties by combining multi wavelength measurements using a priori constraints that are applied differently than in the single wavelength methods. SSA retrieval in the ultraviolet (UV) part of the spectrum is weaker with has large uncertainties and is rarely available.~~ As AERONET does not provide any information about SSA at the UV, compared to the visible- ~~and infrared~~ spectral region, only a few publications have dealt with aerosol absorption at UV wavelengths (e.g. Eck et al., 1998; Krotkov et al., 2005a; Bais et al., 2005; Corr et al., 2009). It is envisaged that improvement in measurement ~~precision~~ [accuracy](#) and in the general understanding of aerosol absorption in the UV (and immediate derivatives like the SSA) in various scientific applications, will contribute significantly to enhancing the accuracy of [UV related](#) radiation forcing estimates. For example, desert dust particles (Alfaro et al., 2004), soot produced by fossil fuel burning, and urban transportation, all strongly absorb UV radiation. However, optical properties of other potential UV absorbers like organic, nitrate and aromatic aerosols are still poorly known (Jackbson, 1999). [Torres et al., \(2007\), in an overview study of OMI aerosols products, summarized the algorithmical techniques of SSA satellite retrieval at 388nm, which uses spectral variability between 354nm and 388nm , 388nm reflectance and a selection on the aerosol type. They compared to AERONET SSA at 440nm and found a root mean square error of 0.03.](#) Bergstrom et al., 2003 showed that spectra of aerosol SSA obtained in different campaigns around the world differed significantly from region to region, but in ways that could be ascribed to regional aerosol composition. Moreover, results from diverse air, ground, and laboratory studies, using both radiometric and in situ techniques, show that the fractions of black carbon, organic matter, and mineral dust in atmospheric aerosols play a role in the determination of the wavelength dependence of aerosol absorption (Russell et al., 2010). Barnard et al. (2008) [and Corr et al., \(2009\)](#), investigating the variability of SSA in a ~~case~~ [field](#) study for the Mexico City metropolitan area, found that, in the near-UV spectral range (250-300 to 400 nm), SSA is much lower compared to SSA at 500 nm indicative of enhanced absorption in the near-UV

1 range. They suggested that absorption by elemental carbon, dust or gas alone could not  
2 account for this enhanced absorption leaving the organic carbon component of the aerosol as  
3 the most likely absorber. It has been found in many studies that, in addition to dust, the  
4 absorbing organic carbon compounds can induce strong spectral absorption increasing  
5 towards the shortest UV wavelengths. Sources of these light-absorbing organic carbon  
6 compounds (often called as “Brown Carbon”, BrC) are various; biomass burning (e.g.  
7 Kirchstetter et al.2004), urban smoke (e.g. Liu et al. 2015) and biogenic emissions (e.g. Flores  
8 et al. 2014).

9 [Corr et al. \(2009\) presented a review of studies estimating SSA at different wavelengths. For](#)  
10 [the visible part of the spectrum, two different approaches have been presented. The first](#)  
11 [\(Dubovik et al., 2002\), introduced sky radiance measurements in a matrix inversion technique](#)  
12 [to calculate various aerosol microphysical properties. This methodology has been widely](#)  
13 [applied in the AERONET. The second \(Eck et al.,2003, \(Kassianov et al., 2005\), proposed](#)  
14 [the use of radiative transfer model \(RTM\) calculations, using as input measurements of AOD](#)  
15 [and the ratio of direct to diffuse irradiance at specific wavelengths. However, in the case of](#)  
16 [SSA calculations at UV wavelengths, enhanced measurement uncertainties, RTM input](#)  
17 [assumptions, and interference of absorption by other gases \(O<sub>3</sub>, NO<sub>2</sub>\), make the retrieval more](#)  
18 [difficult. All reported results concerning UV-SSA, utilize RTM combined with total and](#)  
19 [diffuse relative irradiance measurements \(Herman et al., 1975; King and Herman 1979; King](#)  
20 [1979; Petters et al., 2003; Krotkov et al., 2005b; Corr et al., 2009; Bais et al., 2005\) or](#)  
21 [absolute irradiance measurements \(Kazadzis et al., 2010; Ialongo et al., 2010; Bais et al.,](#)  
22 [2005\). The review made by Corr et al. \(2009\) also presents the major differences in the results](#)  
23 [of simulations of the SSA, arising from RTM input assumptions, measurement techniques and](#)  
24 [retrieved wavelengths. An additional problem is that previous studies have dealt with short](#)  
25 [time periods due to the limited lifespan of experimental campaigns.](#)

26  
27 Moosmuller et al (2012) showed that iron concentration in mineral dust aerosols is linked to  
28 lower SSA at 405nm than in 870, which could be a hint [reason](#) for lowest SSA in the UV-VIS  
29 range during dust events. Medina et al (2012) found in El Paso-Juarez also large variation in  
30 UV range SSA, with lower values than visible wavelengths and showed that on heavy  
31 polluted days it can get as low as 0.53 at 368nm. An effort was made to calculate SSA in  
32 lower UV wavelengths, using Brewer [\(Direct and Global Spectral Irradiance at UV range\)](#)

1 measurements, at Belgium, revealing lowest values but with high uncertainty (Nikitidou et al,  
2 2013). Recently Schuster et al (2016) have tried to distinguish aerosol types, by their optical  
3 properties and assumed that dust particles have higher absorption at UV wavelengths, ~~and~~.  
4 They used imaginary refractive index spectral dependence to separate from black carbon and  
5 infer hematite/goethite in the coarse mode. They found that dust particles containing hematite  
6 are highly absorbing in the UV region.

7 Ultraviolet (UV) solar radiation has a broad range of effects on life on Earth (UNEP et al.,  
8 1998; UNEP et al., 2007; UNEP, 2003). It influences not only human beings (e.g. (Diffey,  
9 1991)), but also plants and animals (e.g. Bornman and Teramura, 1993). Furthermore, it  
10 causes degradation of materials and functions as a driver of atmospheric chemistry. There are  
11 various studies linking changes of the UV radiation field with changes in the scattering and  
12 absorption of aerosols in the atmosphere (e.g. Zerefos et al., 2012, Balis et al., 2004, Reuder  
13 and Schwander, 1999, Krzyścin and S. Puchalski 1998). Such changes can be comparable in  
14 magnitude ~~to with~~ those caused by the decline in stratospheric ozone (Elminir, 2007; Reuder  
15 and Schwander, 1999; Krotkov et al., 1998). As an example, analysis of long term UV time  
16 series at Thessaloniki, Greece, showed a reduction of 7% of AOD (305nm) per decade was  
17 recorded, but the UV Irradiance has increased by 9% (after removing ozone column effect on  
18 it) which could only be explained by change in the absorption characteristics of aerosols in  
19 the area (Meleti et al, 2009). Moreover, UV variations ~~caused-induced~~ by changes in aerosol  
20 optical properties directly affect tropospheric photochemistry causing:

- 21 - increases in regional O<sub>3</sub> (10-20 ppb for Eastern USA) caused by increased UV levels  
22 due to the presence of non-absorbing aerosols (Dickerson et al., 1997).
- 23 - decreases in regional O<sub>3</sub> (up to 50 ppb for Mexico City and for particular days) caused  
24 by strong UV reduction due to absorbing aerosols (Castro et al., 2001).

25 There are also several more scientific issues that may be clarified with accurate knowledge of  
26 aerosol absorption properties:

- 27 • *Aerosol effects on UV trends may enhance, reduce or reverse effects of stratospheric*  
28 *ozone change*

29 Future scenarios for simulations of global UV levels are based on ozone recovery, having as  
30 their sole input the predicted future decline in columnar ozone. Furthermore, simulations of  
31 observed tendency of reduced anthropogenic aerosols in the atmosphere in the US and Europe

during the course of the last decade (den Outer et al., 2005) included only cloud and AOD changes in the characterization of likely UV trends. In this regard, changes in the absorbing properties of aerosols on global scales would have had a large effect on the uncertainty budget in any of the above simulations (WMO, 2003). For example, a decrease in aerosol absorption properties accompanied by an AOD decrease in Europe could lead to a significant acceleration of the calculated ozone decline related to UV upward trends (Kazadzis et al., 2009, Zerefos et al., 2012).

- ~~Solar irradiance satellite~~ *Satellite retrieval algorithms of the surface UV irradiance* are directly affected by the presence of absorbing aerosols

The discrepancies between ground-based (GB) UV measurements and satellite-derived (OMI, TOMS, GOME) data are directly related to aerosol absorption that is absent from current satellite retrieval algorithms (Tanskanen et al., 2007; Arola et al., 2005). It has been shown that enhanced aerosol UV absorption in urban areas can cause up to 30% overestimation in the satellite retrieved UV radiation (Kazadzis et al., 2009).

- ~~Uncertainty on~~ *commonly used atmospheric radiative transfer applications and codes*

Radiative transfer algorithms calculating surface UV irradiance, ~~fall short in precision~~ lacks accuracy due to large uncertainties in the input parameters (e.g. levels of ozone, aerosol composition and the surface albedo) used in model calculations. It is now known that the major input source of uncertainty in radiative-transfer model simulations, is aerosol absorption (e.g. Van Weele et al., 2000). In particular, the direct radiative effect of aerosols is very sensitive to mid-visible SSA. For example, a change in SSA from 0.9 to 0.8 can often alter the sign of the direct effect (Yu et al., 2006). Furthermore, availability and quality of observational SSA data do not match with those available for AOD (Krotkov et al., 2005a). This is compounded by the lack of information on the vertical profile of aerosol optical properties such as the SSA at global scales. Only few case studies have dealt with such measurements and have been limited to local scales (Müller et al., 1999).

~~a. The major parameters that describe radiation and aerosol interactions are the aerosol optical depth ( $\tau$ ), the SSA and the asymmetry parameter ( $g$ ). The aerosol optical depth at a wavelength  $\lambda$  is the integral of the aerosol extinction coefficient ( $b_{\text{ext}}(\lambda)$ ) over a certain atmospheric layer (in the height range  $z_1$  to  $z_2$ ).~~

~~b.~~



$$\tau = \int_{x_1}^{x_2} b_{ext}(\lambda) \cdot dz \quad (1)$$

The SSA at a wavelength  $\lambda$  provides the contribution of aerosol particle scattering relative to the total extinction (absorption plus scattering);

$$SSA = \frac{b_{scat}(\lambda)}{b_{abs}(\lambda) + b_{scat}(\lambda)} \quad (2)$$

Values for the SSA range from 0 (absorbing aerosols only) to 1 (no absorption). The asymmetry parameter, is the phase function (P) weighted average of the cosine of the scattering angle ( $\theta$ ) over all directions. Assuming azimuthal symmetry, the scattering angle integration extends from  $-\pi$  to  $+\pi$  such that the asymmetry parameter (g) is given by

$$g = \frac{1}{2} \cdot \int_{-\pi}^{\pi} \cos\theta \cdot P(\theta) \cdot \sin\theta \cdot d\theta \quad (3)$$

Values for g range from -1 (backscattered radiation only) to 1 (forward scattered radiation only) in theory, and from 0 to 1 for particles in the atmosphere.

Corr et al. (2009) presented a review of studies estimating SSA at different wavelengths. For the visible part of the spectrum, two different approaches have been presented. The first (Dubovik et al., 2002), introduced sky radiance measurements in a matrix inversion technique to calculate various aerosol microphysical properties. This methodology has been widely applied in the AERONET. The second (Kassianov et al., 2005), proposed the use of radiative transfer model (RTM) calculations, using as input measurements of AOD and the ratio of direct to diffuse irradiance at specific wavelengths. However, in the case of SSA calculations at UV wavelengths, enhanced measurement uncertainties, RTM input assumptions, and interference of absorption by other gases ( $O_3$ ,  $NO_2$ ), make the retrieval more difficult. All reported results concerning UV SSA, utilize RTM combined with total and diffuse relative irradiance measurements (Herman et al., 1975; King and Herman 1979; King 1979; Petters et al., 2003; Krotkov et al., 2005b; Corr et al., 2009; Bais et al., 2005) or absolute irradiance measurements (Kazadzis et al., 2010; Ialongo et al., 2010; Bais et al., 2005). The review made by Corr et al. (2009) also presents the major differences in the results of simulations of the SSA, arising from RTM input assumptions, measurement techniques and retrieved wavelengths. An additional problem is that previous studies have dealt with short time periods due to the limited lifespan of experimental campaigns.

In this work, for the calculation of the UV-SSA, we adopt a methodology based on the idea of Krotkov et al. (2005a), Krotkov et al. (2005b) and Corr et al. (2009). The methodology,

together with the retrieval tools used and technical assumptions made are presented in section 2. Results of UV-SSA measurements and their comparison with synchronous AERONET retrievals in the visible range are presented in section 3. Finally, discussion of the observed diurnal SSA patterns in Athens, SSA wavelength dependency as well as overall conclusions are presented in the last section of this work.

## 2 Instrumentation and retrieval methodology

### 2.1 Instrumentation

In this work we present estimates of SSA at two independently retrieved UV wavelengths 332nm and 368 nm for an urban site situated in Athens, Greece. The period of measurements analysed is from July 2009 to May 2014. Since February 2009, the ground-based Atmospheric Remote Sensing Station (ARSS) has been in continuous operation to monitor ground radiation levels and aerosol loadings over Athens (Amiridis et al., 2009). ARSS is located on the roof of the Biomedical Research Foundation of the Academy of Athens (37.9 N, 23.0E, 130 m a.s.l.) (<http://apcg.meteo.noa.gr/index.php?option=112&client=&langid=2>) and the campus is located near the city centre, 10 km from the sea (Gerasopoulos et al., 2009). The horizon view is clear at 360 degrees viewing angle. ARSS is equipped with a CIMEL CE318-NEDPS9 sun photometer for the retrieval of AOD at 8 wavelengths in the range of 340nm to 1640 nm, including polarization measurements as part of NASA's AERONET (<http://aeronet.gsfc.nasa.gov>). The technical specifications of the instrument are given in detail by Holben et al. (1998). ARSS is also equipped with an Ultraviolet Multi-filter Radiometer (UVMFR) instrument for radiation measurements in the UV spectral region (Harrison et al., 1994). UVMFR measures both total and diffuse irradiance at 7 specified wavelengths (300, 305.5, 311.4, 317.6, 325.4, 332.4, and 368 nm) with a 2 nm nominal full width at half maximum (FWHM) bandwidth. The instrument has been purchased on November 2009 and the ~~constructing~~manufacturing company (Yankee Environmental Systems, USA) has provided angular, spectral and absolute response functions of each wavelength channel of the instrument that were measured at the National Institute of Standards and Technology (Figure 1). For the analysis included in this work we assume that the effective wavelengths for each channel were stable during the whole period. Measurements of total and diffuse irradiances are recorded every 10 seconds, and stored as 1

minute averages along with a computation of the direct irradiance. Measurement data were angle-corrected, calibrated and analysed via the YESDAS Manager software. The individually characterized cosine response, supplied with each instrument, was used by system software to correct, in real time, for deviations from the ideal cosine response (Harrison et al., 1994). For this work, we have used measurements of the two aforementioned instruments in conjunction with radiative transfer model (RTM) ~~calculations that have been performed using the Libradtran code~~ (Mayer and Kylling, 2005).

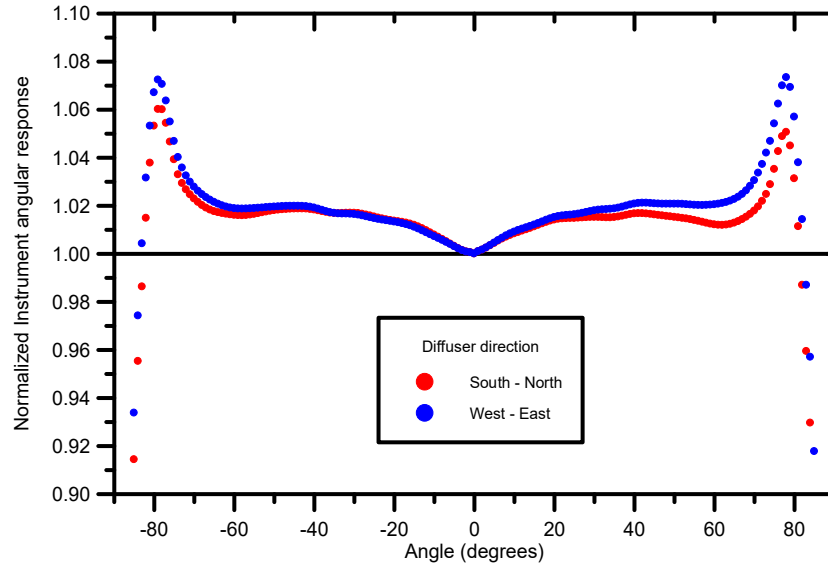

**Figure 1.** UVMFR angular response function at 368nm channel, normalized to the ideal (cosine) angular response. 2 sets of responses one from the south to north scan and one from the west to east are presented.

## 2.2 Retrieval methodology

SSA is a key aerosol optical property and describes the portion of solar irradiance that is scattered from the main direct beam passing through the atmosphere. Changes in SSA influence mostly the diffuse radiation reaching the earth's surface, while its effect on direct radiation can be considered negligible. ~~SSA values in the atmosphere range from 0.5 to 1.0 at visible wavelengths. SSA at a wavelength  $\lambda$  provides the contribution of aerosol particle scattering relative to the total extinction (absorption plus scattering).~~

$$SSA = \frac{b_{sca}(\lambda)}{b_{abs}(\lambda) + b_{sca}(\lambda)} \quad (1)$$

~~Theoretically Values for the SSA-SSA values range from 0 (totally absorbing aerosols-only) to 1 (no absorptiontotally scattering aerosol). Actual SSA values in the atmosphere can be~~

~~found usually in the range of , although it cannot be less than 0.2 because of the light~~  
~~diffraction through the aerosols, and in the atmosphere is usually in the range 0.65 0.5 to 1~~  
~~(Corr et al., 2009). The asymmetry parameter, is the phase function (P) weighted average of~~  
~~the cosine of the scattering angle ( $\theta$ ) over all directions. Assuming azimuthal symmetry, the~~  
~~scattering angle integration extends from  $-\pi$  to  $+\pi$  such that the asymmetry parameter (g) is~~  
~~given by~~

$$g = \frac{1}{2} \cdot \int_{-\pi}^{\pi} \cos\theta \cdot P(\theta) \cdot \sin\theta \cdot d\theta \quad (2)$$

~~Values for g range from -1 (backscattered radiation only) to 1 (forward scattered radiation~~  
~~only) in theory, and from 0 to 1 for particles in the atmosphere.~~

Model calculations can be used for retrieving SSA when global and/or diffuse spectral irradiance, solar zenith angle (SZA), total column ozone, and AOD are known (Krotkov et al., 2005b; Kazadzis et al., 2010; Ialongo et al., 2010; Corr et al., 2009; Bais et al., 2005). In our retrieval methodology we have used partly the basic approach that is described in detail in the Corr et al. (2009), Krotkov et al. (2005a) and Krotkov et al. (2005b). This approach consists of measurements of the direct to global irradiance ratios (DGR) and AODs measured with the UVMFR instrument for our case, that are used as basic input parameters to the RTM for the calculation of the SSA at 332nm, and 368nm. These wavelengths are selected for having the lowest ozone absorption from the seven available (Bass and Paur, 1985). The advantage of this method is that the same detector and filter measure global and direct irradiance, thus there is no need for absolute irradiance calibration and raw voltage measurements ~~corrected for nighttime voltages and angular response~~ - could be used.

Global irradiance measurements from the UVMFR have been used in order to distinguish cloud free conditions for each of the one minute measurements. Clouds are detectable in the measured UVMFR global irradiance (GI) (at 368nm) since they cause larger variability than aerosols. For distinguishing between cloudy and cloud free conditions, we have applied an updated version of the method of Gröbner et al., (2001). The method is based on the comparison of the measured global irradiance with radiative transfer calculations for cloud free conditions and quality assurance is checked by the following criteria:

- a. The measured GI has to lie within the modeled (cloud free) GI for a range of aerosol loads (AOD at 500 nm of 0.1 and 0.8, respectively), corresponding to the 5th and 95th percentile of the AERONET data for the examined location and period
- b. The rate of change in the measured GI with SZA has to be within the limits depicted by the modeled cloud free GI, otherwise the measurements are assumed cloud contamination.
- c. All measured GI values within a time window ( $dt = \pm 10$  min) should be within 5% of the modeled cloud free GI, and adjusted to the level of the measurement, using an integral over [dt time interval](#).

If at least 85% of the points in  $dt$  pass tests a) – c), then the central point is flagged as cloud free. In this study, we have allowed a tolerance level of  $\pm 10\%$  for tests a) and b) in order to compensate for differences between the modeled GI and measured GI due to instrumental uncertainties, as well as for usage of average climatological parameters (constant total ozone column, SSA, e.t.c.) as inputs to the model. We have limited the method to  $SZA < 70^\circ$  to avoid uncertainties related with low solar irradiance levels. An example of the results of the method is presented in figure 2 for a day with variable cloudiness. It has to be noted that in all CIMEL-UVMFR comparisons, using synchronous measurements, both the above method and AERONET cloud [flagging-screening](#) algorithm ([presented by Smirnov, et al, 2000](#)) are taken into account.

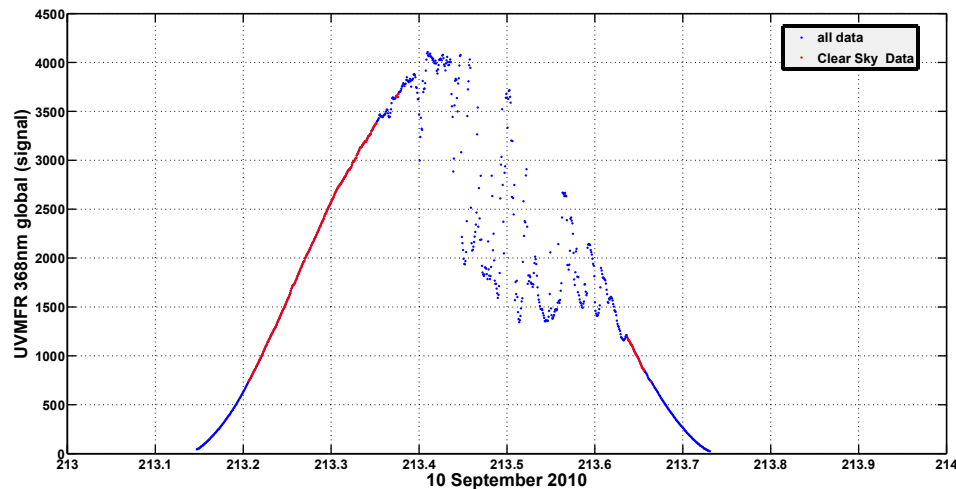

**Figure 2.** Determination of cloudless 1-minute measurements (red), from all measurements (blue) for a day with variable cloudiness [in the afternoon](#).

Measurements of the diffuse and global irradiance from the UVMFR have been used in order to retrieve the direct irradiance at 332nm and 368nm. We used the AERONET database to select days with very low AOD (<0.1). For the urban environment of Athens such cases are related with the presence of northern winds. Afterwards we selected cloudless sky half-days for performing-determining extraterrestrial Langley calibration constant (ETC) determination by applying the Beer-Lambert law for-UVMFR direct voltage measurements.  $V_{0\text{langley}}$  in figure 3 represent the half day values calculated with this method. In order to examine the consistency of this approach we calculated the  $V_{0\text{cimel}}$  also as

$$V_{0\text{cimel}} = V e^{\mu (AOD_{\text{cimel}} + \tau_{\text{rayleigh}})}$$

where V is the voltage measured by UVMFR,  $\mu$  is the air mass,  $AOD_{\text{cimel}}$  is the extrapolated AOD at UVMFR wavelengths and  $\tau_{\text{rayleigh}}$  is Rayleigh scattering optical depth. Daily averages of  $V_{0\text{cimel}}$  for the selected days were compared with  $V_{0\text{langley}}$  as presented at figure 3. These independent approaches appear stable through the years, with no obvious drift or change, so we decided to use a single ETC for the whole period for each wavelength.

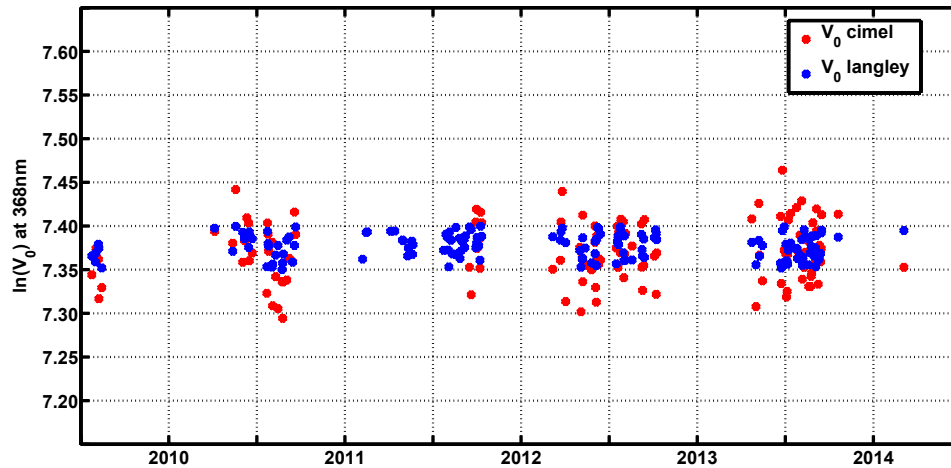

**Figure 3.** ETC values at 368nm, calculated using Langley plots of UVMFR measurements, and Using Cimel extrapolated AOD's as input, for selected (low AOD's and clear sky) days for the whole period

AOD's at 332 nm and 368 were calculated using the selected UVMFR derived ETC. In contrast with the Krotkov et al., 2005a approach we have not transferred the CIMEL ETCs to

1 the UVMFR measurements; rather, we have independently calculated UVMFR-based AODs.  
 2 Validation of the results was performed based on synchronous UVMFR and CIMEL  
 3 measurements. The mean AOD calculated from the 1 minute UVMFR measurements within  
 4  $\pm 5$  minutes from the CIMEL measurement (when the UVMFR 10 minute period is  
 5 characterized by cloudless conditions) has been defined as synchronous. Since the CIMEL  
 6 instrument provides measurements of AOD at 340 nm and 380 nm, we first calculated the  
 7 CIMEL derived AOD at 332 nm and 368 nm, using applying least square quadratic spectral  
 8 extrapolation, using  $\ln(\text{AOD})$  as function of  $\ln(\text{wavelength})$  from AERONET  
 9 measurements at 340nm 380nm, 440nm and 500nm. using four CIMEL wavelengths (Eck  
 10 et al, 1999).

11

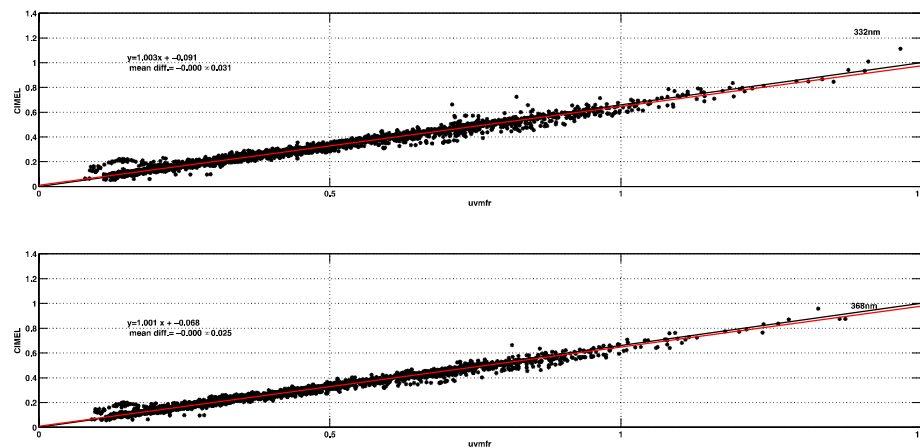

12

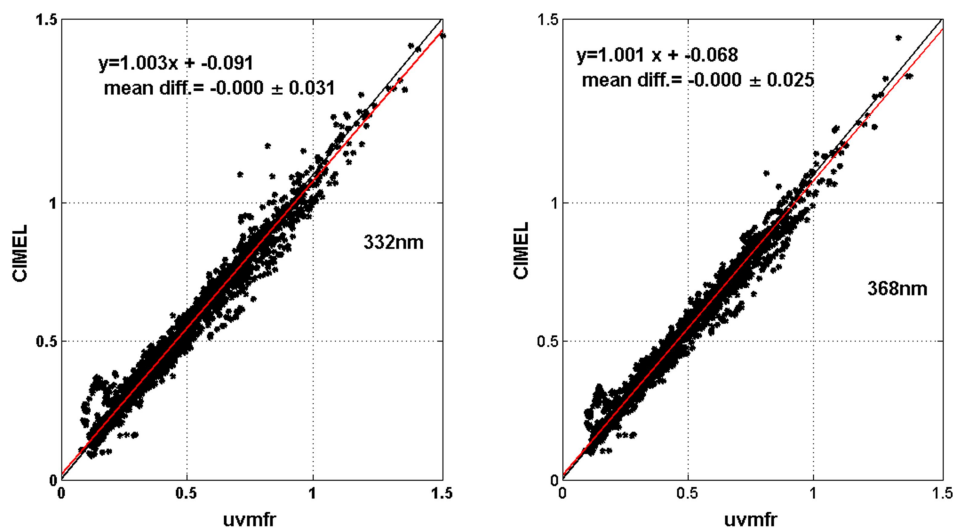

13

**Figure 4.** Comparison of CIMEL and UVMFR retrieved AODs for synchronous measurements for 332 nm (left panel) and 368 nm (right panel).

The results of this comparison have a Pearson product moment correlation coefficient equal to 0.96 and 0.98 respectively for 332nm and 368nm AODs. Mean differences were zero, with standard deviations of 0.031 and 0.025 for the respective wavelengths, comparable with the CIMEL AOD retrieval uncertainty of  $\pm 0.02$ . The quality of the data produced can be verified by comparing the AOD's retrieved by the two instruments as a function of SZA (figure ~~54~~<sup>5</sup>). Relative stability of the AOD differences (that are in the order of the AERONET uncertainties), verifies the validity of the calibration of the UVMFR AOD's, ~~and the fact that no SZA dependent errors (that would be directly related with an erroneous ETC determination) are included found in this procedure.~~ An AOD, SZA dependent trend, in the order of 0.02 (if excluding the 15° SZA bin) can be observed which could be attributed to ETC determination uncertainty or non ideal correction for the cosine response error of the UVMFR.

In figure 5, AOD's have been grouped in bins of 5 degrees (of SZA). The differences shown in figure 5 include ETC determination accuracy, the extrapolation of CIMEL AOD at 368nm, together with instrumental/measurement errors. Using a single UVMFR ETC for the whole period provides very good agreement between the two instruments. However, this may not be the case for all UVMFR instruments using this approach as ETC may suddenly or gradually change especially for years-long time series due to instrumental (filter related) changes. AOD's deviations could lead to large errors ~~on~~<sup>in</sup> SSA calculations, so this comparison ensures that these errors are minimized. The instrument's teflon diffuser contamination is the most common reason for long term changes in the ETC. Maintenance procedure for the Athens instrument included cleaning and inspection of the diffuser and check of the levelling and shadowing, three times a week. In addition, metal spikes have been built around the instrument to avoid the diffuser destruction by birds.



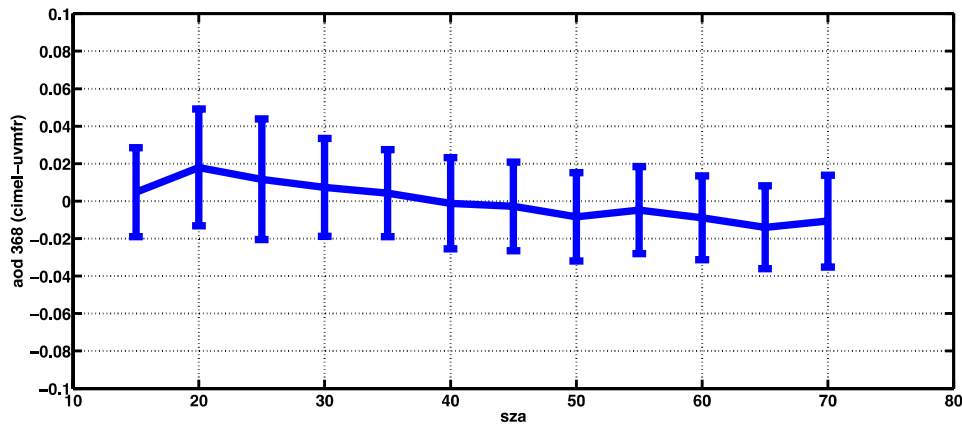

**Figure 5** AOD differences between CIMEL and UVMFR at 368 nm, as a function of solar zenith angle.

We calculated look up tables (LUT) with the RTM, of DGR at 368nm and 332nm as a function of SZA, AOD, SSA, asymmetry factor ( $g$ ) and total column ozone. CIMEL/AERONET mean daily ozone values and climatological [satellite derived](#)  $\text{NO}_2$  values were ~~deployed for the use of~~ [used for construction of](#) the LUT while for  $g$ , we used the mean daily value as retrieved at 440nm from the CIMEL instrument measurements when available and the mean value of the whole period equal to 0.7 ( $2\sigma$  standard deviation of the  $g$  during this period was 0.04) otherwise. Using UVMFR AOD and DGR measurements, we then calculated the matching SSA values for each individual UVMFR DGR measurement. LUT examples are visualized in figure 6, for clarification of the method. For known SZA and AOD (in cloudless sky conditions), the variability of the DGR is caused by aerosol properties other than AOD. At low aerosol loads this variation is nearly negligible, but it becomes more important at higher aerosol load. More absorbing aerosols lead to smaller values of DGR. It is crucial to observe the range of SSAs in the two examples. For low AOD's, accurate SSA determination requires very low uncertainty of the DGR and the AOD measurement. While for high AOD's the range of DGRs for a particular SZA is quite large.

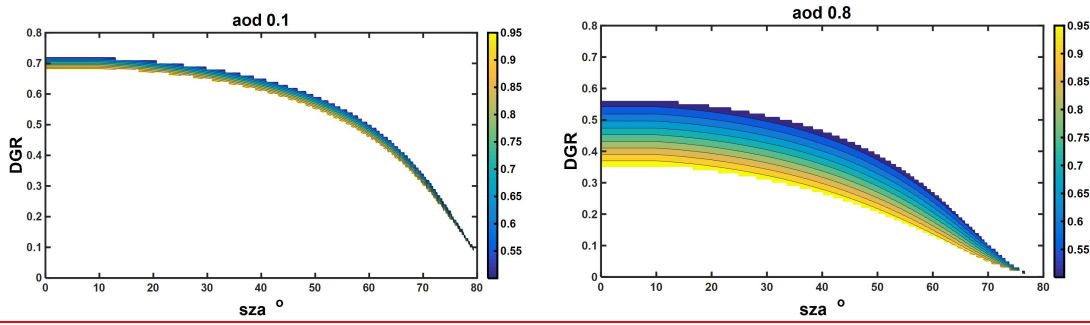

**Figure 6** LUT of direct to global ratio at 368nm, as calculated for AOD 0.1 (left) and 0.8 (right) with respect to SZA ( $g=0.7$ ), colourbar represents assumed SSA values.

### 2.3 Retrieval Uncertainties

The CIMEL sunphotometer provides SSA inversion retrievals characterized as Level 1.5 and Level 2.0 data. Level 2.0 (L2) data are recommended by AERONET as they have less uncertainty but are restricted in measurement to  $SZA > 50$  degrees,  $AOD$  at  $440\text{ nm} > 0.4$  and homogeneous sky conditions. These limitations make AERONET SSA L2 worldwide measurements unsuitable for:

- climatological studies due to the AOD restriction that limits analyses only to areas having large average annual AODs, or to cases of moderate to high aerosol episodes in specific areas. As an example, for the urban site of Athens, which is one of the most polluted cities in Europe, the number of measurements is limited to an average 11 cases per month for the whole analysis period.
- diurnal variation studies due to the SZ A restriction. For mid and low latitude sites, this limitation leads to a severe lack of information on diurnal SSA patterns as there are only few wintertime measurements and close to zero measurements at local noon.

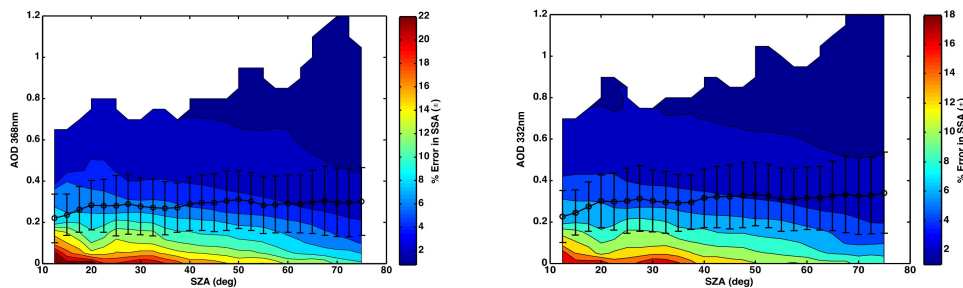

**Figure 7** Uncertainty estimate (color) for the SSA retrieval from UVMFR as a function of AOD and solar zenith angle for 368nm (left panel) and 332nm (right panel), based on DGR and AOD uncertainties. Superimposed, mean AODs for 2.5 degree bins of solar zenith angle are shown.

Level 1.5 data: AERONET Level 1.5 (L1.5) SSA data are provided by AERONET for all AOD's and at all SZA that almucantar scans are performed. In this work L1.5 data were used, but with an extra quality control. We have ignored SSA L1.5 data when L2 size distribution is not available. Thus we have an enhanced L1.5 SSA data set with AOD<0.4, but with L2 cloud screening, calibrations and quality controls. Data has been compared with UVMFR retrieved SSA's taking into account limitations related with the retrieval uncertainties. Khatri et al (2016) studied AERONET SSA retrieval uncertainties, in order to compare with SKYNET and found that AOD errors introduce the largest variations. They also found that the sky irradiance calibration has a primary role ~~on~~in the uncertainty of the retrieval, and they investigated influence of surface albedo and sphericity of aerosols, that was found negligible.

For the UVMFR data the uncertainty of the UVMFR SSA retrieval is mainly related to:

- direct to global irradiance measurements uncertainties.
- RTM input data accuracy.

Direct to global irradiance measurement uncertainties can result to a range of SSA values rather than a single value, that would produce a close match between the measurement and the RTM DGR outputs. This range broadens at low SZA and ~~low-high~~ aerosol level cases, as shown in Figure 6, when the effect of the scattering/absorbing nature of aerosols in radiation is higher~~greater~~. The RTM inputs that were used for the SSA LUT construction include also an uncertainty budget (AOD, surface albedo, constant aerosol vertical profile, asymmetry factor). Following the uncertainty analysis of Krotkov et al. (2005b), the total relative uncertainty of the DGR measurement was calculated to be  $\pm 3\%$ . AOD absolute uncertainty is considered as  $\pm 2\%0.02$  for 368nm and  $\pm 4\%0.04$  for 332nm, following the analysis of previous section. The impact of this on the SSA calculation is directly connected with AOD levels and the SZA. In figure 7 we have calculated the UVMFR SSA retrieval uncertainty for different AOD's and solar zenith angles, caused by DGR and AOD uncertainty. DGR and AOD uncertainty ranges from previous paragraph were used to calculate the possible SSA

range and the expected error. In the ~~same~~ figure, the mean AOD's ~~and 1 $\sigma$~~ , for each SZA bin (errorbars equal to one standard deviation), for Athens measured by the UVMFR at each solar angle, are shown.

### 3 SSA retrieval results

Using the methodology described in the previous section we calculated the SSA at 332nm and 368nm using 1 minute data from the UVMFR. For the period under investigation, we also calculated the daily mean SSA's at these two wavelengths in the UV band and also the mean daily SSA's in the visible band derived from data provided by the CIMEL (L1.5 data) operating in Athens' AERONET station (figure 8).

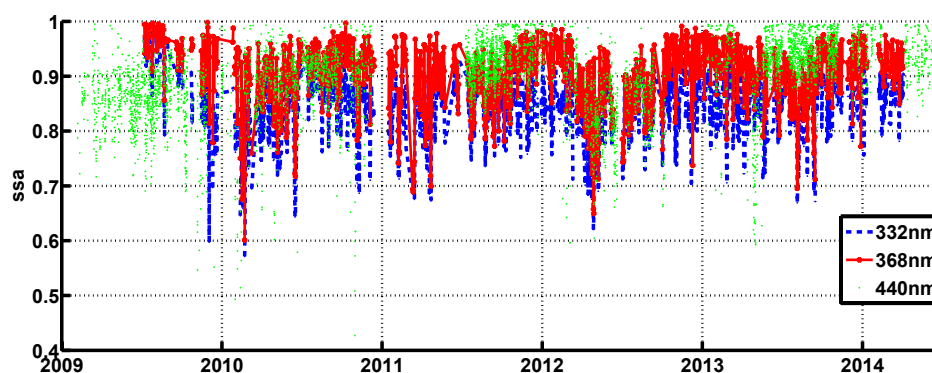

**Figure 8** ~~Daily m~~Mean ~~daily~~ SSAs in the UV (UVMFR) at two wavelengths and ~~at 440nm~~the visible range (CIMEL) for Athens area.

The variability of SSA during this period is quite high, ranging from 0.75 (0.62) to 0.98 (0.97) for ~~332nm-368nm~~ (~~368nm332nm~~) (2 standard deviations) with mean values of 0.90, 0.87 and 0.83 for 440nm, 368nm and 332nm respectively. In figure 9 we have calculated the mean monthly values of SSA at UV wavelengths and standard deviations for the whole period to examine the annual variability. The lowest SSA values were found for the period from February to May at both wavelengths, which should be linked to the usual dust events during this period for the ~~specifie~~ area, and also the presence of brown carbon. ~~Pareskevopoulou~~Paraskevopoulou, et al (2014), have found maximum values of Organic and Elemental Carbon, ~~atin~~ February and November, ~~atin~~ a 5 year (2008-2013) data set of in-situ measurements, at center of Athens. However, most months have similar ~~behavior~~SSAs, with

1 | differences that lie well within the SSA variability of each month. Looking at the monthly  
2 | mean AODs; despite the fact that standard deviations of both SSA and AOD's are large, it can  
3 | be seen that higher AOD's are associated with less absorbing aerosol cases.

4

1

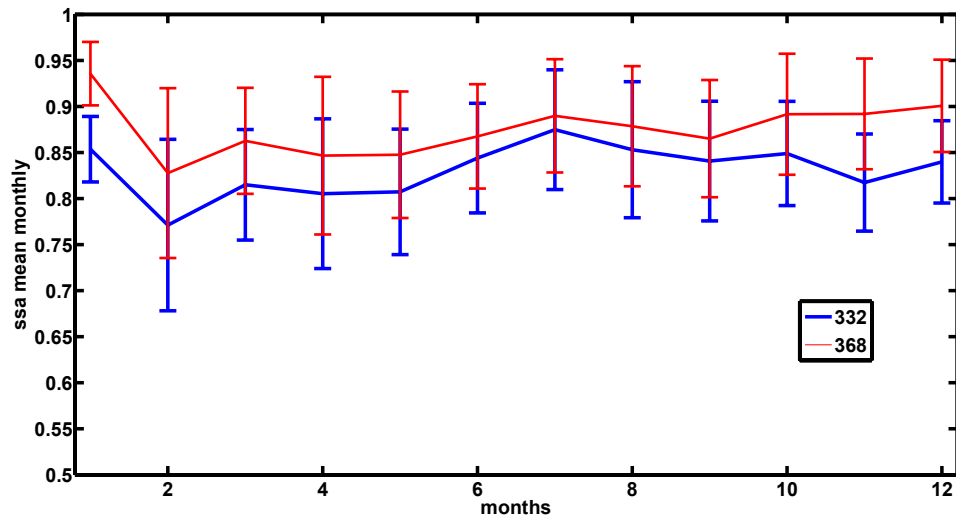

2

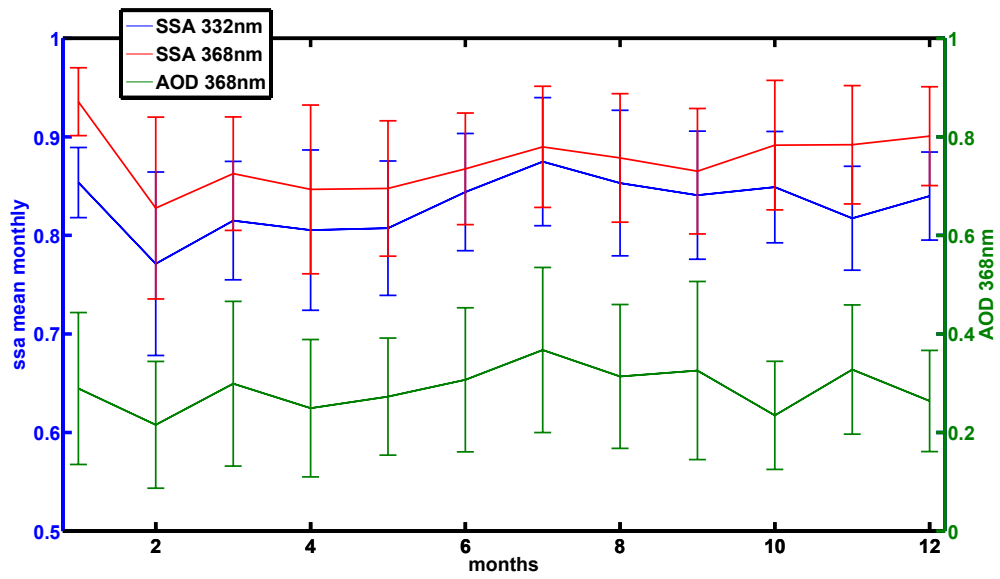

3

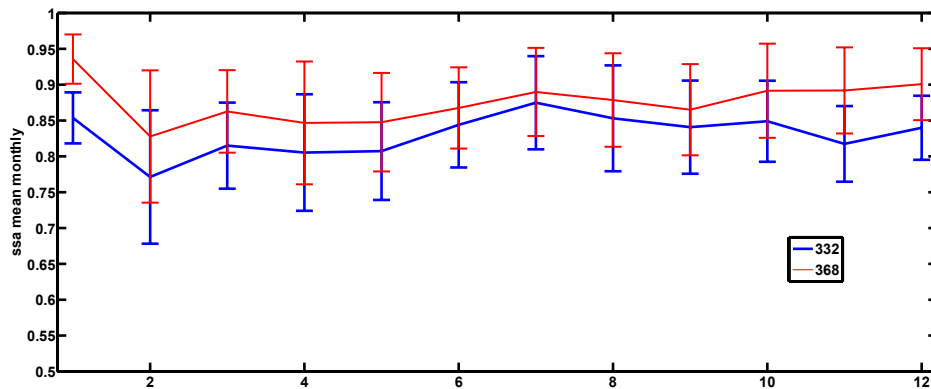

**Figure 9** Mean monthly SSAs (left axis) in the UV (UVMFR) at two wavelengths and AOD at 368nm from the UVMFR (right axis) for the whole 5-year period, at Athens, errorbars at represent one standard deviation of the mean.~~equal to~~.

When calculating diurnal patterns of the SSA at UV and visible wavelengths for the Athens area, we observed a mean diurnal pattern with a variability of the order of 0.02 to 0.05 and having highest absorption (lowest SSA's)  $\pm 2$  hours around noon (figure 10). Similar behavior can also be seen from AERONET retrieved SSA's having higher values observed during the early morning and late evening. However, the SZA limitation of the AERONET retrieval methodology leads to lack of measurement points around noon. To investigate the uncertainty in relation to UVMFR retrievals, the diurnal pattern was calculated for different SSA ~~uncertainty~~ bins according to the analysis ~~of~~ in the previous section. In general, the daily pattern is clear for each bin and is mirrored by the AERONET inversion retrievals. However, the statistical ~~error one standard deviation~~ bars are quite large. These bars describing the variability of the SSA's during each hourly bin, ~~are quite large~~ but also include ~~the uncertainty of the retrieved value~~ retrieval uncertainty. We have to note that since no restriction has been introduce for UVMFR SSA retrievals at low AOD's the uncertainty related with these data becomes larger as seen also in figure 7.~~e~~.

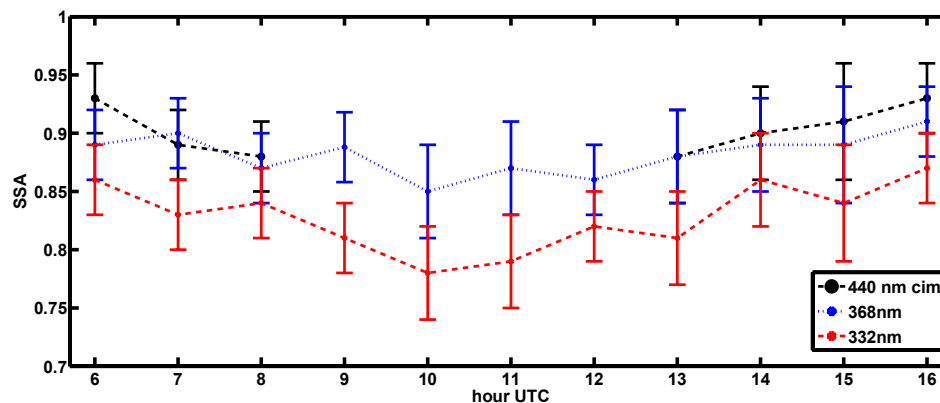

**Figure 10** Diurnal patterns of SSA derived from the UVMFR and CIMEL measurements. Mean values per hour plotted at 1 $\sigma$  with errorbars at one standard deviation. Local time in Athens is UTC+2(winter) UTC+3(summer)

1 In order to investigate the possible dependence of SSA on AOD, figure 11 shows the  
 2 synchronous UVMFR and CIMEL SSA retrievals plotted against AOD at 440nm. We found  
 3 that in general, SSA decreases with a decrease in optical extinction, although lower AOD's  
 4 are [also](#) linked to higher uncertainties of retrieved SSA. We believe that this behavior reflects  
 5 seasonal changes in the average aerosol composition in Athens. Indeed, the annual cycle of  
 6 SSA is the same as the AOD annual cycle having a maximum in summer and a minimum in  
 7 winter. Studies of the SSA annual variability for other cities such as Ispra, Italy and  
 8 Thessaloniki, Greece (Arola et al., 2005, Bais et al., 2005) revealed the same trend, with low  
 9 SSA values (high absorption) associated with low AOD and reminiscent of mostly wintertime  
 10 cases. It has to be noted that due to low AOD, uncertainties associated with the data obtained  
 11 from both retrieval techniques (AERONET and UVMFR), are quite high. For higher AOD  
 12 ( $>0.67$ ), CIMEL retrievals show an almost constant value of the SSA  $\sim 0.92$ , while lower  
 13 values have been ~~calculated when moving towards shorter wavelengths~~ [retrieved at smaller](#)  
 14 [AODs](#). Similar results were reported by Krotkov et al. (2005b) when analyzing  
 15 measurements derived at [Washington, USA at AERONET calibration site in Greenbelt,](#)  
 16 [Maryland USA.](#)

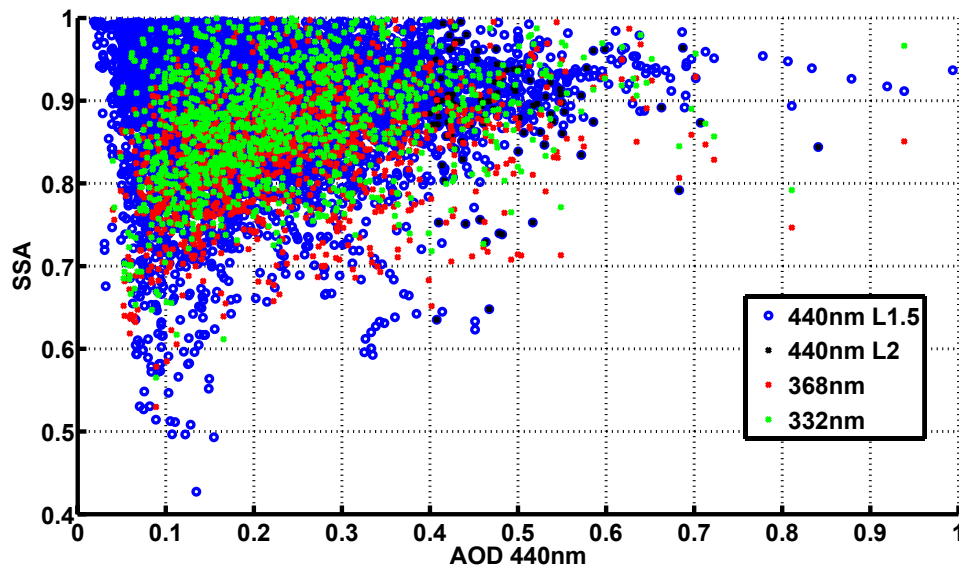

17  
 18 **Figure 11** Dependence of the calculated SSA from AOD measurements

19  
 20 We performed an analysis of the differences of SSAs between the visible and the UV parts of  
 21 the spectrum based on aerosol characteristics using synchronous CIMEL and UVMFR SSA



1 retrievals and an aerosol classification scheme described in detail in Mielonen et al. (2009).  
2 There, a classification of AERONET data was used in order to derive 6 aerosol types based  
3 on the SSA measurement at 440nm and the AE that was derived in the 440-870 nm  
4 wavelength range. Mielonen et al. (2009) used a visualization of this characterization, by  
5 plotting AE versus SSA for individual sites, and compared their results with the CALIPSO  
6 (Omar et al., 2005) aerosol classification scheme obtaining good agreement. In addition, the  
7 difference between SSA at 440 nm and 1020 nm (similar to the approach applied by Derimian  
8 et al. (2008)), was implemented to better distinguish fine absorbing aerosols from coarse ones.  
9 The main idea was to fill this SSA versus AE aerosol type related “space” with the differences  
10 of  $SSA_{440}-SSA_{368}$  (SSADIFF) to investigate a possible link between [SSA](#) wavelength  
11 dependence and aerosol type. In figure 12 using the Mielonen et al. (2009) aerosol typing  
12 approach, we plot SSADIFF for different classes (colored scale), and separate aerosol types  
13 by areas in the SSA/AE plot . In addition, actual points of  $SSA_{440}$  retrieved by the CIMEL  
14 instrument are shown in order to categorize Athens results according to the classification  
15 scheme.

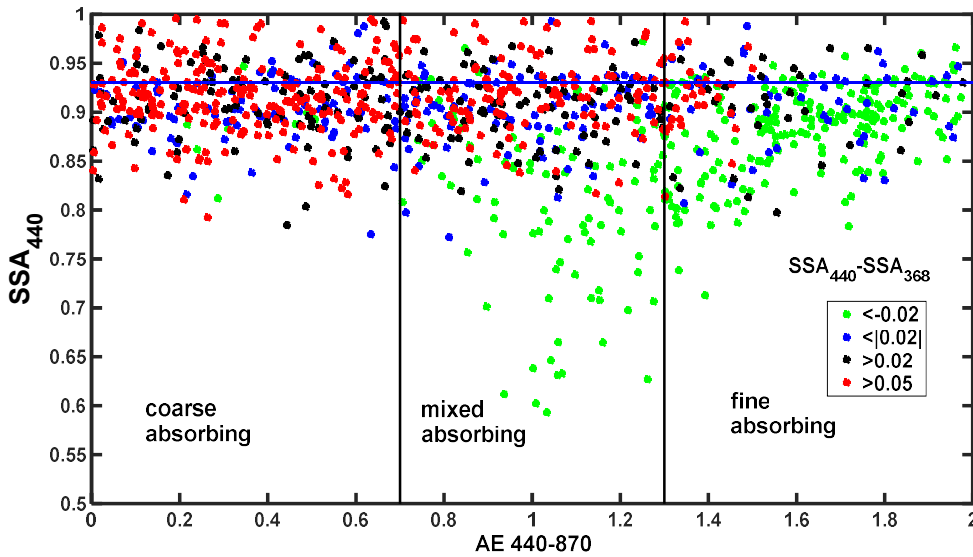

**Figure 12** Daily average  $SSA_{440}$  (CIMEL) versus  $AE_{(440-870nm)}$ . Colors represent different bins of the spectral differences of  $SSA_{440nm}-SSA_{368nm}$ .

The results [of in](#) figure 12 show that a mixture of aerosol types characterizes the ARSS site in Athens, with  $SSA_{440}$  values spanning all 6 sub-spaces. Analyzing the wavelength dependence

of the SSA, by defining SSADIFF as the difference  $SSA_{440} - SSA_{368}$ , there is evidence that high negative SSADIFF values (that means that the SSA at UV wavelengths is equal or relatively higher than  $SSA_{440}$ ) tend [to occur](#) towards high AEs. For these cases (green color in figure 11) we observe high absorption cases with AE's around 1, which can be attributed ~~in-to~~ polluted dust aerosol events. Also the majority of cases which comply with the condition  $AE < 0.7$  are found with lower SSA at UV by at least 0.05 compared to  $SSA_{440}$ . More specifically, dust cases (mainly during spring) can be identified due to the proximity of Athens to the Saharan desert (Gerasopoulos, et al., 2010), explaining this behavior of absorbing aerosols at UV with low AE. Russell, et al., (2010) reported results obtained from diverse datasets showing SSA wavelength dependency from the IR down to visible wavelengths. In addition, Bergstrom et al. (2007) presented SSA spectra for dust-containing aerosols campaigns (PRIDE and ACE-Asia) including AERONET measurements at sites that are affected by dust such as Cape Verde, Bahrain (Persian Gulf) and the Solar Village (Saudi Arabia). Both studies concluded that the SSA spectra for AERONET locations, dominated by desert dust decrease with decreasing wavelength. In addition, Russell et al., (2010) reported that SSA spectra for AERONET locations dominated by urban-industrial and biomass-burning aerosols decrease with increasing wavelength in line with the results of Bergstrom et al. (2007). Figure 12 also shows that similar SSA values can be found for 440nm and 368nm and for fine aerosol cases ( $AE > 1.4$ ).

In order to understand the potential relative contributions of dust and brown carbon better, we applied the method of Schuster et al., (2016) to the AERONET measurements in Athens. This method separates [contributions from](#) black carbon, organic carbon, hematite and goethite, [using to the retrieved](#) refractive index at all available wavelengths, even in complex mixtures. Figure 12-13 shows the fractions of total aerosol volume attributed to these components, as well as the volume fractions accordingly. It is evident, according to this approach, that both brown carbon and mineral dust are likely absorbing components involved in the aerosol mixture in Athens, and brown carbon playing the more dominant role. Brown carbon highly absorbs in UV wavelengths and hardly any above 0.7nm (Kirchstetter et al., 2004). BrC fraction is higher [at in OCTOBEROctober](#), but it has very large concentrations at the period March-June, which partly explains low SSA values at figure 9.

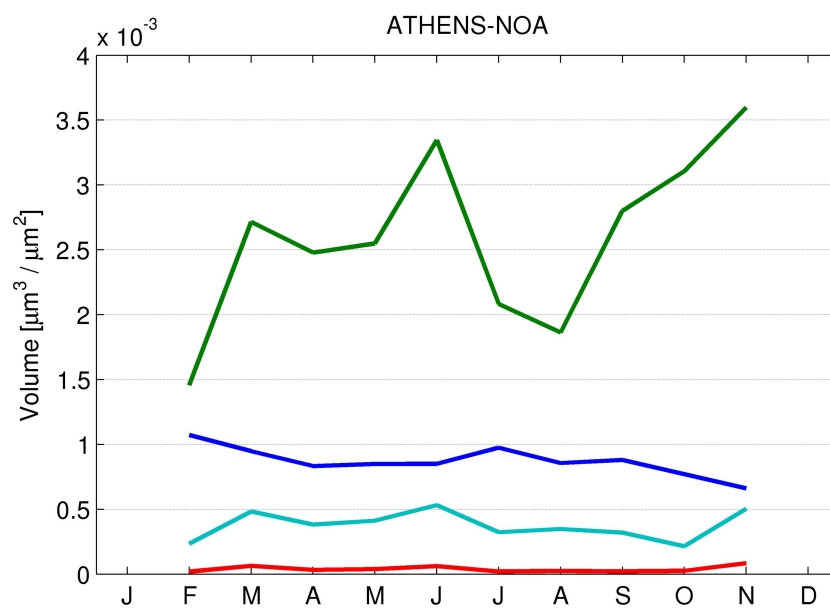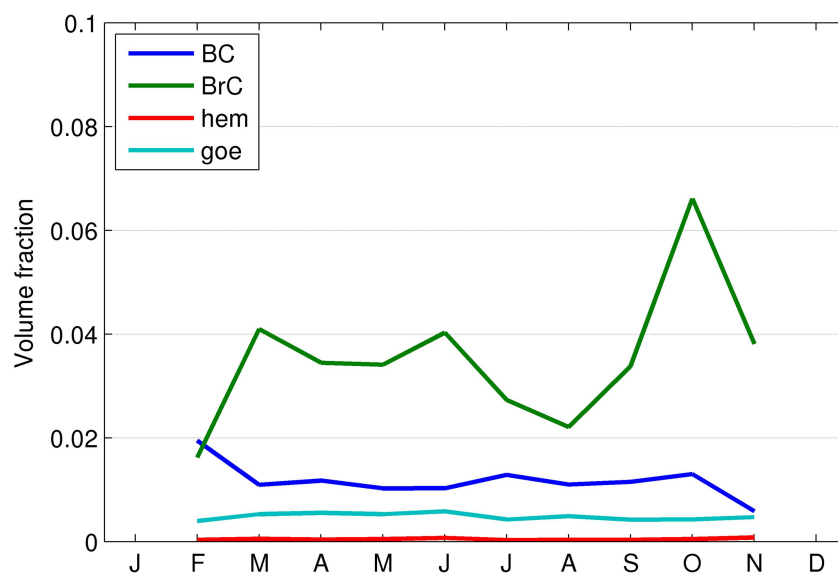

**Figure 13.** Total volume (in the upper plot) and volume fraction (in the lower plot) of absorbing aerosol components, as inferred by the method of Schuster et al. 2016. The retrieval gives the fractions for fine and coarse mode separately and here the contributions are shown as mode-weighted median value.

1 The utility of the AE for aerosol ~~scattering-extinction~~ is that its value depends primarily on the  
 2 size of the particles, ranging from a value of 4 for very small particles (Rayleigh scattering) to  
 3 around 0 for very large particles (such as cloud drops). Thus AE for atmospheric aerosol  
 4 ~~scattering-mixtures~~ varies between limits specified by particle size. Various studies (e.g.  
 5 Bergstrom et al., 2007) have used the Ångström Absorption Exponent (AAE) for studying the  
 6 aerosol absorption wavelength dependence for different aerosol types and mixing (which is  
 7 calculated similarly with the Ångström Exponent, only using Absorption Optical depth  
 8 [AOD\*(1-SSA)] instead of AOD). As the absorption AOD is a relatively smooth decreasing  
 9 function with wavelength, it can be approximated with a power law wavelength dependence  
 10 via the AAE which is defined as the negative of the slope of the absorption on a log-log plot.  
 11 ~~Figure 13-14 shows~~Investigating the ~~the~~ temporal variability of  $AAE_{(440-870)}$  and  $AAE_{(332-440)}$ .  
 12 ~~m~~Measurements of  $AAE_{(440-870)}$  are found to lie between 0.9 and 1.5 ( $2\sigma$ ) in accordance with  
 13 the results of Bergstrom et al., (2007).  $AAE_{(332-440)}$  in the UV range is very different from that  
 14 in the visible, with values ranging from 1.4 to 5 ( $2\sigma$ ). A direct comparison reveals that for the  
 15 aerosol composition features of Athens, the AAEs are usually up to 4 times higher in the UV  
 16 range than in the visible. This is due to a combination of the enhanced absorption (lower  
 17 SSA's) that has been found in the UV, together with higher AOD's in this band.  
 18 Finally, we have calculated mean CIMEL SSA values for all four retrieved wavelengths  
 19 (440nm, 673nm, 870nm and 1020nm) for the whole period under study, and synchronous (5  
 20 minute SSA averaged around the CIMEL measurement time) UVMFR SSAs at UV (332nm  
 21 and 368nm). The results are shown in figure 14 with errorbars at  $1\sigma$ . Datasets of SSA  
 22 retrievals are separated in 3 cases accordingly: a) all points (CIMEL L1.5 and all synchronous  
 23 UVMFR data), b) measurements retrieved with  $AOD > 0.2$  (reduced uncertainty), ~~and~~ c) SSA  
 24 retrievals for  $AE_{340-440} < 0.7$ , to identify dust events ~~and d) cases with  $AE > 1.2$  to include the~~  
 25 ~~fine mode cases.~~ While for all cases the calculated standard deviation is quite high ( $\geq 0.05$ ),  
 26 there is a systematic SSA decrease in the UV range, and mean differences of 0.07 and 0.02  
 27 have been found when comparing SSA at the visible range and SSA at 332nm and 368nm  
 28 respectively. Dust cases in particular show a spectral decrease in SSA with decreasing  
 29 wavelength from 1022nm (CIMEL) down to 332nm (UVMFR). ~~Fine mode cases show~~  
 30 ~~smaller spectral dependence ( $SSA_{440nm} - SSA_{332nm} < 0.03$ ).~~

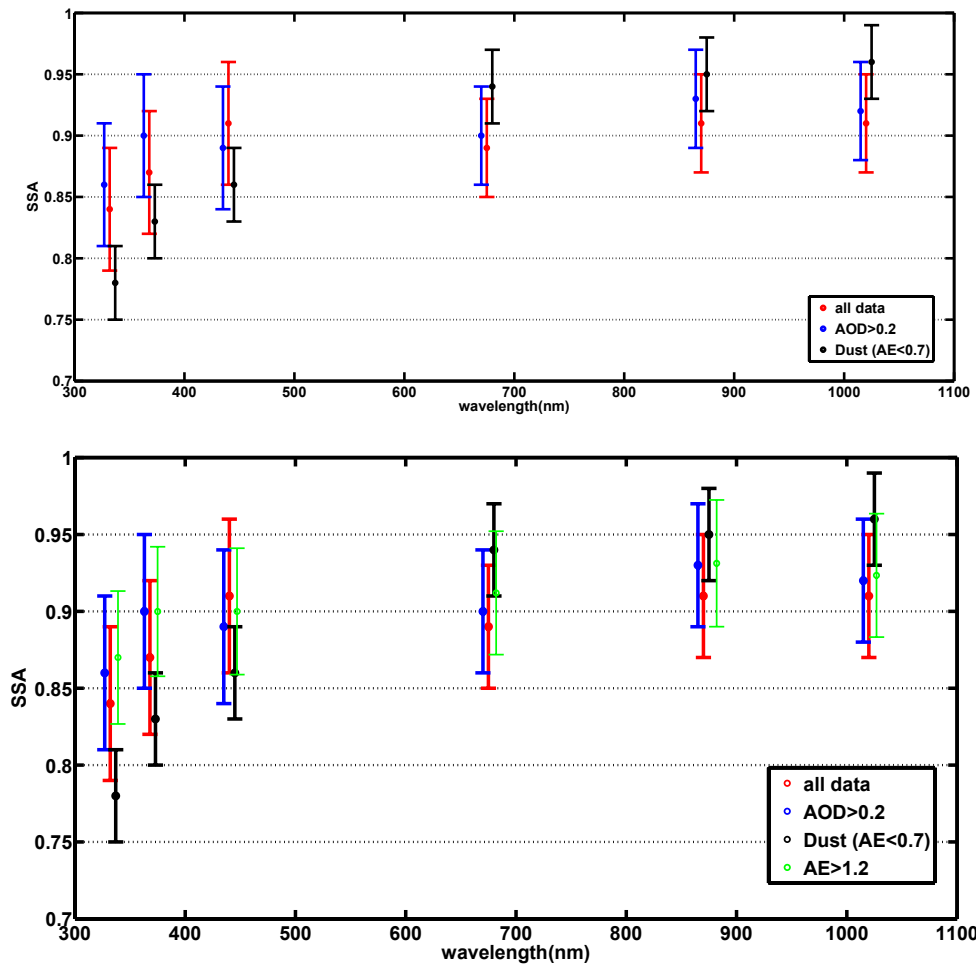

**Figure 14** Wavelength dependence of SSA from synchronous CIMEL and UVMFR measurements. Blue points represent all data points, red data retrievals with AOD>0.2, green points data with AE>1.2 and black data only dust aerosol cases. Vertical bars represent one standard deviation of the calculated mean.

The spectral dependence of the SSA from the visible to the UV wavelengths is in agreement with findings presented by Corr et al., (2009) and Krotkov et al., (2009). With the same approach applied to Mexico City where measurements are also influenced by city emissions and blowing dust, Corr et al. (2009) studied the SSA behavior at UV wavelengths and showed that for AOD>0.1, SSA varied from 0.78 to 0.80 for 332nm and 368nm respectively with enhanced absorption at UV wavelengths relative to the visible wavelengths attributable to these types of aerosols. Krotkov et al., (2009) have modified a UVMFR in order to measure

also at 440nm , and found strong SSA wavelength dependence across blue and near UV spectral region.

#### 4 Conclusions

Advantages of measuring the aerosol absorption (SSA) in the UV with the UVMFR instrument can be summarized as follows:

- AOD, in the UV wavelength range, is higher (for the same aerosol mass) than in the visible spectral range
- SSA retrievals with the uncertainty of  $\pm 0.03$  can be derived for  $\text{SZA} > 40$  degrees and with an uncertainty of  $\pm 0.04$  for all  $\text{SZA}$  where  $\text{AOD} \geq 0.2$
- SSA retrievals are stable and repeatable over the five year period

We have analyzed a 5 year period of UVMFR and CIMEL measurements at the city of Athens retrieving SSA at visible and UV wavelengths based on the effect of aerosol SSA on the Direct to Global Ratio (DGR) for a given AOD and air mass. Since the CIMEL retrieval algorithm is more accurate for high SZA, the combination of the two instruments allows for an increase in measurement frequency of SSA and the ability to derive a complete diurnal cycle of aerosol absorption. In addition, the spectral differences of the aerosol absorption properties in the visible and UV wavelength range have been investigated, using synchronous CIMEL and UVMFR retrievals. Results of this work confirmed similar results found for Mexico City, Mexico (Corr et al., 2009), Washington DC, USA (Krotkov et al., 2005b) and Rome, Italy (Ialongo et al., 2010), that presented enhanced absorption of aerosols for UV wavelengths.

We have also used the produced dataset to investigate possible effects of aerosol type on observed SSA wavelength differences. The enhanced UV absorption can be mainly due to either dust or organic aerosol. Our analysis of Athens AERONET measurements suggests that the relative role of absorbing organic aerosol would be somewhat more significant than dust. The enhanced aerosol absorption found when comparing UV and visible spectrum results, shows that:

- We expect a systematic overestimation of modeled solar UV irradiance using SSA from extrapolation from the visible range as an input to RTMs

- ~~We expect a~~There is a possibility-possible of a decrease in specific days/cases of regional O<sub>3</sub> due to the enhanced aerosol absorption (Li et al., 2005). But for the Athens case this could be verified only with Chemical model results.
- Satellite post-correction ~~validation~~-results (e.g. Arola et al., 2009), including aerosol absorption effects, have to take into account absorption enhancement in the UV range.
- We expect an overestimation on the UV irradiance (UV Index) calculations on cloudless cases under dust and/or brown carbon presence when using SSA values from the visible range. This as a combination of the overestimated SSA and the high AODs during such events.

However, the spectral SSA differences, that we found, are well within the uncertainty of both retrievals as instrumental effects or absolute calibration uncertainties of sky radiances (~5% for the CIMEL almucantar measurements) might also play an important role when performing such comparisons. The coincidence of AOD measurements, from both instruments, using a single ETC for various SZA over the extended 5 year period used here, is a sign that no systematic SZA dependent factors influence the final SSA results.

The extended SSA dataset significantly improves comparative statistics and provides additional information on the effect of varying background aerosol conditions and higher aerosol absorption than that provided by Washington, DC, where dust aerosol cases are very rare. In conclusion, the combined use of CIMEL sun and sky radiance measurements in the visible with UVMFR total and diffuse irradiance measurements in the UV, provide an important advantage for remote measurements of column aerosol absorption over the UV-Visible spectral range.

## Acknowledgements

P.Raptis would like to acknowledge the project «Aristotelis- SOLAR (50561), Investigation on the factors affecting the solar radiation field in Greece». V. Amiridis and S. Kazadzis would like to acknowledge the project “European Union’s Horizon 2020 Research and Innovation Programme ACTRIS-2 (grant agreement no. 654109)”

## References

- 1 Alfaro, S. C., Lafon, S., Rajot, J. L., Formenti, P., Gaudichet, A., and Maillé, M.: Iron oxides  
2 and light absorption by pure desert dust: An experimental study, *Journal of Geophysical*  
3 *Research D: Atmospheres*, 109, D08208 08201-08209, 10.1029/2003jd004374, 2004.
- 4 Amiridis, V., Kafatos, M., Perez, C., Kazadzis, S., Gerasopoulos, E., Mamouri, R. E.,  
5 Papayannis, A., Kokkalis, P., Giannakaki, E., Basart, S., Daglis, I., and Zerefos, C.: The  
6 potential of the synergistic use of passive and active remote sensing measurements for the  
7 validation of a regional dust model, *Annales Geophysicae*, 27, 3155-3164, 10.5194/angeo-27-  
8 3155-2009, 2009.
- 9 Arola, A., Kazadzis, S., Krotkov, N., Bais, A., Gröbner, J., and Herman, J. R.: Assessment of  
10 TOMS UV bias due to absorbing aerosols, *Journal of Geophysical Research D: Atmospheres*,  
11 110, 1-7, 2005.
- 12 [A. Arola, S. Kazadzis, A. Lindfors, N. Krotkov, J. Kujanpaa, J. Tamminen, A. Bais, A. di](#)  
13 [Sarra, J. M. Villaplana, C. Brogniez, A. M. Siani, M. Janouch, P. Weihs, T. Koskela, N.](#)  
14 [Kouremeti, D. Meloni, V. Buchard, F. Auriol, I. Ialongo, M. Staneck, S. Simic, A. Webb, A.](#)  
15 [Smedley, and S. Kinne, A new approach to correct for absorbing aerosols in OMI UV: a](#)  
16 [preliminary evaluation, Geophysical Research Letters, 36, L22805,](#)  
17 [doi:10.1029/2009GL041137, 2009](#)
- 18 Bais, a F., McKenzie, R. L., Bernhard, G., Aucamp, P. J., Ilyas, M., Madronich, S., &  
19 Tourpali, K. (2014). Ozone depletion and climate change: impacts on UV radiation.  
20 *Photochemical & Photobiological Sciences : Official Journal of the European Photochemistry*  
21 *Association and the European Society for Photobiology*. doi:10.1039/c4pp90032d
- 22
- 23 Bais, A. F., Kazantzidis, A., Kazadzis, S., Balis, D. S., Zerefos, C. S., and Meleti, C.:  
24 Deriving an effective aerosol single scattering albedo from spectral surface UV irradiance  
25 measurements, *Atmospheric Environment*, 39, 1093-1102 2005.
- 26 [Balis, D. S., Amiridis, V., Zerefos, C., Kazantzidis, A., Kazadzis, S., Bais, A. F., Meleti, C.,](#)  
27 [Gerasopoulos, E., Papayannis, A., Matthias, V., Dier, H., and Andreae, M. O.: Study of the](#)  
28 [effect of different type of aerosols on UV-B radiation from measurements during](#)  
29 [EARLINET, Atmos. Chem. Phys., 4, 307-321, doi:10.5194/acp-4-307-2004, 2004.](#)



- 1 Barnard, J. C., Volkamer, R., and Kassianov, E. I.: Estimation of the Mass Absorption Cross  
2 section of the organic carbon component of aerosols in the Mexico City Metropolitan Area,  
3 *Atmospheric Chemistry And Physics*, 8, 6665-6679, 2008.
- 4 Bergstrom, R. W., Pilewskie, P., Schmid, B., and Russell, P. B.: Estimates of the spectral  
5 aerosol single scattering albedo and aerosol radiative effects during SAFARI 2000, *Journal of*  
6 *Geophysical Research D: Atmospheres*, VOL. 108, 8474, pp. 11, doi:10.1029/2002JD002435,  
7 2003
- 8 Bornman, J.F. and Teramura, A.H. Effects of ultraviolet-B radiation on terrestrial plants. In  
9 *Environmental UV-Photobiology*, Young, A.R., Björn, L.O., Moan, J. and Nultsch, W. (eds.),  
10 Plenum Press, New York, pp. 427-471.1993.
- 11 Castro, T., Madronich, S., Rivale, S., Muhlia, A., and Mar, B.: The influence of aerosols on  
12 photochemical smog in Mexico City, *Atmospheric Environment*, 35, 1765-1772, 2001.
- 13 Corr, C. A., Krotkov, N., Madronich, S., Slusser, J. R., Holben, B., Gao, W., Flynn, J., Lefer,  
14 B., and Kreidenweis, S. M.: Retrieval of aerosol single scattering albedo at ultraviolet  
15 wavelengths at the T1 site during MILAGRO, *Atmospheric Chemistry And Physics*, 9, 5813-  
16 5827, 2009.
- 17 den Outer, P. N., Slaper, H., and Tax, R. B.: UV radiation in the Netherlands: Assessing long-  
18 term variability and trends in relation to ozone and clouds, *J. Geophys. Res.*, 110, D02203,  
19 10.1029/2004jd004824, 2005.
- 20 Derimian, Y., J.-F. Léon, O. Dubovik, I. Chiapello, D. Tanré, A. Sinyuk, F. Auriol, T. Podvin,  
21 G. Brogniez, and B. N. Holben, Radiative properties of aerosol mixture observed during the  
22 dry season 2006 over M'Bour, Senegal (African Monsoon Multidisciplinary Analysis  
23 campaign), *J. Geophys. Res.*, 113, D00C09, doi:10.1029/2008JD009904, 2008.
- 24 Dickerson, R. R., Kondragunta, S., Stenchikov, G., Civerolo, K. L., Doddridge, B. G., and  
25 Holben, B. N.: The impact of aerosols on solar ultraviolet radiation and photochemical smog,  
26 *Science*, 278, 827-830, 1997.
- 27 Diffey, B. L.: Solar Ultraviolet-Radiation Effects On Biological-Systems, *Physics In*  
28 *Medicine And Biology*, 36, 299-328, 1991.

- 1 Dubovik, O., and King, M. D.: A flexible inversion algorithm for retrieval of aerosol optical  
2 properties from Sun and sky radiance measurements, *Journal Of Geophysical Research-*  
3 *Atmospheres*, 105, 20673-20696, 2000.
- 4 Dubovik, O., B. N. Holben, T. Lapyonok, A. Sinyuk, M. I. Mishchenko, P. Yang, and I.  
5 Slutsker, Non-spherical aerosol retrieval method employing light scattering by spheroids,  
6 *Geophys. Res. Lett.*, 29(10), 1415, doi:10.1029/2001GL014506, 2002.
- 7 Eck, T.F., Holben, B.N., Reid, J.S., Dubovik, O., Smirnov, A., O'Neill, N.T., Slutsker, I. and  
8 Kinne, S., "Wavelength dependence of the optical depth of biomass burning, urban and desert  
9 dust aerosols," *J. Geophys. Res.* 104, 31333–31350. 1999.
- 10 Eck T. F., B. N. Holben, I. Slutsker, and A. Setzer, "Measurements of irradiance attenuation  
11 and estimation of aerosol single scattering albedo for biomass burning aerosols in Amazonia,"  
12 *J. Geophys. Res.* 103, 31865–31878, 1998
- 13
- 14 Elminir, H. K.: Sensitivity of ultraviolet solar radiation to anthropogenic air pollutants and  
15 weather conditions, *Atmospheric Research*, 84, 250-264, 29 January 2012, 2007.
- 16 [Eck, T.F., Holben, B.N., Ward, D.E., Mukelabai, M.M., Dubovik, O., Smirnov, A., Schafer,](#)  
17 [J.S., Hsu, N.C., Piketh, S.J., Queface, A. and Roux, J.L., 2003. Variability of biomass burning](#)  
18 [aerosol optical characteristics in southern Africa during the SAFARI 2000 dry season](#)  
19 [campaign and a comparison of single scattering albedo estimates from radiometric](#)  
20 [measurements. Journal of Geophysical Research: Atmospheres, 108\(D13\), 2003-](#)
- 21 Flores, J. M., Washenfelder, R. A., Adler, G., Lee, H. J., Segev, L., Laskin, J., Laskin,  
22 A., Nizkorodov, S. A., Brown, S. S., and Rudich, Y.: Complex refractive indices in the  
23 near-ultraviolet spectral region of biogenic secondary organic aerosol aged with  
24 ammonia, *Phys. Chem. Chem. Phys.*, 16, 10629–10642, doi:10.1039/C4cp01009d, 2014.
- 25
- 26 Gerasopoulos, E., Kokkalis, P., Amiridis, V., Liakakou, E., Perez, C., Haustein, K.,  
27 Eleftheratos, K., Andreae, M. O., Andreae, T. W., and Zerefos, C. S.: Dust specific extinction  
28 cross-sections over the Eastern Mediterranean using the BSC-DREAM model and sun  
29 photometer data: The case of urban environments, *Annales Geophysicae*, 27, 2903-2912,  
30 10.5194/angeo-27-2903-2009, 2009.
- 31 Goering, C. D., L'Ecuyer, T. S., Stephens, G. L., Slusser, J. R., Scott, G., Davis, J., Barnard, J.  
32 C., and Madronich, S.: Simultaneous retrievals of column ozone and aerosol optical properties

1 from direct and diffuse solar irradiance measurements, J. Geophys. Res., 110, D05204,  
2 10.1029/2004jd005330, 2005.

3 L. Harrison, J. Michalsky, and J. Berndt, “Automated Multi-Filter Rotating Shadowband  
4 Radiometer: An instrument for Optical Depth and Radiation Measurements”, Appl. Optics,  
5 33, 5118-5125, 1994.

6 Gröbner, J., N.Kouremeti, and D.Rembges: A systematic comparison of solar UV radiation  
7 spectra with radiative transfer calculations, 8th European Symposium on Physico-Chemical  
8 Behaviour of Air Pollutants, A Changing Atmosphere EC, ORA/POST 62172, 2001.

9 B. M. Herman, S. R. Browning, and J. J. DeLuisi, “Determination of the effective imaginary  
10 term of the complex refractive index of atmospheric dust by remote sensing: the diffuse-direct  
11 radiation method,” J. Atmos. Sci. 32, 918–925, 1975.

12 Holben, B. N., Eck, T. F., Slutsker, I., Tanré, D., Buis, J. P., Setzer, A., Vermote, E., Reagan,  
13 J. A., Kaufman, Y. J., Nakajima, T., Lavenu, F., Jankowiak, I., and Smirnov, A.: AERONET-  
14 A Federated Instrument Network and Data Archive for Aerosol Characterization, Remote  
15 Sens. Environ., 66, 1–16, 1998.

16 Ialongo, I., Buchard, V., Brogniez, C., Casale, G. R., and Siani, A. M.: Aerosol single  
17 scattering albedo retrieval in the UV range: An application to OMI satellite validation,  
18 Atmospheric Chemistry And Physics, 10, 331-340, 2010.

19 [IPCC, 2013: Climate Change 2013: The Physical Science Basis. Contribution of Working](#)  
20 [Group I to the Fifth Assessment Report of the Intergovernmental Panel on Climate Change](#)  
21 [\[Stocker, T.F., D. Qin, G.K. Plattner, M. Tignor, S.K. Allen, J. Boschung, A. Nauels, Y. Xia,](#)  
22 [V. Bex and P.M. Midgley \(eds.\)\]. Cambridge University Press, Cambridge, United Kingdom](#)  
23 [and New York, NY, USA, 1535 pp, doi:10.1017/CBO9781107415324.](#)

24 [Jacobson, M. Z. \(1999\), Isolating nitrated and aromatic aerosols and nitrated aromatic gases](#)  
25 [as sources of ultraviolet light absorption, J. Geophys. Res.,104, 3527–3542.](#)

26 Kassianov, E. I., Barnard, J. C., and Ackerman, T. P.: Retrieval of aerosol microphysical  
27 properties using surface MultiFilter Rotating Shadowband Radiometer (MFRSR) data:  
28 Modeling and observations, Journal of Geophysical Research D: Atmospheres, 110, 1-12,  
29 10.1029/2004jd005337, 2005.

1 Kazadzis, S., Bais, A., Balis, D., Kouremeti, N., Zempila, M., Arola, A., Giannakaki, E.,  
2 Amiridis, V., and Kazantzidis, A.: Spatial and temporal UV irradiance and aerosol variability  
3 within the area of an OMI satellite pixel, *Atmospheric Chemistry And Physics*, 9, 4593, 2009.

4 Kazadzis, S., Gröbner, J., Arola, A., and Amiridis, V.: The effect of the global UV irradiance  
5 measurement accuracy on the single scattering albedo retrieval, *Atmos. Meas. Tech.*, 3, 1029-  
6 1037, 10.5194/amt-3-1029-2010, 2010.

7 Khatri, P., T. Takamura, T. Nakajima, V. Estellés, H. Irie, H. Kuze, M. Campanelli et al.  
8 "Factors for inconsistent aerosol single scattering albedo between SKYNET and AERONET."  
9 *Journal of Geophysical Research: Atmospheres* (2016).

10 Kirchstetter, T. W., T. Novakov, and P. V. Hobbs, Evidence that the spectral dependence of  
11 light absorption by aerosols is affected by organic carbon, *J. Geophys. Res.*, 109, D21208,  
12 doi:10.1029/2004JD004999, 2004.

13 M. King and B. M. Herman, "Determination of the ground albedo and the index of absorption  
14 of atmospheric particles by remote sensing. Part I: Theory," *J. Atmos. Sci.* 36, 163–173. 1979

15 M. King, "Determination of the ground albedo and the index of absorption of atmospheric  
16 particles by remote sensing. Part II: Application," *J. Atmos. Sci.* 36, 1072–1083, 1979

17 Krotkov, N. A., Bhartia, P. K., Herman, J., Slusser, J., Labow, G., Scott, G., Janson, G., Eck,  
18 T. F., and Holben, B.: Aerosol ultraviolet absorption experiment (2002 to 2004), part 1:  
19 Ultraviolet multifilter rotating shadowband radiometer calibration and intercomparison with  
20 CIMEL sunphotometers, *Optical Engineering*, 44, 1-17, 2005a.

21 [Krotkov ,N., Labow ,G., Herman,Slusser,Tree, R., Janson,G.,Durham, Eck,T., Holben,B.,](#)  
22 [Aerosol column absorption measurements using co-located UV-MFRSR and AERONET](#)  
23 [CIMEL instruments. Proc. SPIE 7462, Ultraviolet and Visible Ground and Space-based](#)  
24 [Measurements, Trace Gases, Aerosols and Effects VI, 746205 \(August 20, 2009\);](#)  
25 [doi:10.1117/12.826880.](#)

26 Krotkov, N.A., Bhartia, P. K., Herman, J., Slusser, J., Scott, G., Labow, G., Vasilkov, A. P.,  
27 Eck, T. F., Dubovik, O., and Holben, B. N.: Aerosol ultraviolet absorption experiment (2002  
28 to 2004), part 2: Absorption optical thickness, refractive index, and single scattering albedo,  
29 *Optical Engineering*, 44, 1-17, 2005b.

- 1 Krotkov, N. A., Bhartia, P. K., Herman, J. R., Fioletov, V., and Kerr, J.: Satellite estimation  
2 of spectral surface UV irradiance in the presence of tropospheric aerosols 1. Cloud-free case,  
3 Journal of Geophysical Research D: Atmospheres, 103, 8779-8793, 1998.
- 4 [Krzyścin, J. W., and S. Puchalski, Aerosol impact on the surface UV radiation from the](#)  
5 [ground-based measurements taken at Belsk, Poland, 1980–1996, J. Geophys. Res., 103\(D13\),](#)  
6 [16175–16181, doi:10.1029/98JD00899, 1998](#)
- 7 Kudo, R., Uchiyama, A., Yamazaki, A., Kobayashi, E., and Nishizawa, T.: Retrieval of  
8 aerosol single-scattering properties from diffuse and direct irradiances: Numerical studies, J.  
9 Geophys. Res., 113, D09204, 10.1029/2007jd009239, 2008.
- 10 Liu S, AC Aiken, K Gorkowski, MK Dubey, CD Cappa, LR Williams, SC Herndon, P  
11 Massoli, EC Fortner, PS Chhabra, WA Brooks, TB Onasch, JT Jayne, DR Worsnop, S China,  
12 N Sharma, C Mazzoleni, L Xu, NL Ng, D Liu, JD Allan, JD Lee, ZL Fleming, C Mohr, P  
13 Zotter, S Szidat, and ASH Prévôt, Enhanced light absorption by mixed source black and  
14 brown carbon particles in UK winter, Nature Communications, 6, 8435,  
15 doi:10.1038/ncomms9435, 2015.
- 16
- 17 Mayer, B., and Kylling, A.: Technical note: The libRadtran software package for radiative  
18 transfer calculations - Description and examples of use, Atmospheric Chemistry and Physics,  
19 5, 1855-1877, 2005.
- 20 Medina, R., Fitzgerald, R. M., & Min, Q. (2012). Retrieval of the single scattering albedo in  
21 the El Paso-Juarez Airshed using the TUV model and a UV-MFRSR radiometer. *Atmospheric*  
22 *Environment*, 46, 430–440. doi:http://dx.doi.org/10.1016/j.atmosenv.2011.09.028
- 23 Meleti, C., Bais, A. F., Kazadzis, S., Kouremeti, N., Garane, K., & Zerefos, C. (2009). Factors  
24 affecting solar ultraviolet irradiance measured since 1990 at Thessaloniki, Greece.  
25 International Journal of Remote Sensing, 30(15-16), 4167-4179.
- 26 Mielonen, T., Arola, A., Komppula, M., Kukkonen, J., Koskinen, J., de Leeuw, G., and  
27 Lehtinen, K. E. J.: Comparison of CALIOP level 2 aerosol subtypes to aerosol types derived  
28 from AERONET inversion data, GEOPHYS. RES. LETT., 36, L18804,  
29 10.1029/2009gl039609, 2009.

1 Moosmüller, H., J. P. Engelbrecht, M. Skiba, G. Frey, R. K. Chakrabarty, and W. P. Arnott  
2 (2012), Single scattering albedo of fine mineral dust aerosols controlled by iron concentration,  
3 J. Geophys. Res., 117, D11210, doi:[10.1029/2011JD016909](https://doi.org/10.1029/2011JD016909).

4 Müller, D., Wandinger, U., and Ansmann, A.: Microphysical particle parameters from  
5 extinction and backscatter lidar data by inversion with regularization: Simulation, Applied  
6 Optics, 38, 2358-2368, 1999.

7 Nakajima, T., Tonna, G., Rao, R., Boi, P., Kaufman, Y., & Holben, B. (1996). Use of sky  
8 brightness measurements from ground for remote sensing of particulate polydispersions.  
9 Applied Optics, 35(15), 2672-2686.

10 Nikitidou, E., Kazantzidis, A., De Bock, V., De Backer, H., The aerosol forcing efficiency in  
11 the UV region and the estimation of single scattering albedo at a typical West European site,  
12 Atmospheric Environment (2013), doi: 10.1016/j.atmosenv.2012.12.035

13 Omar, A. H., Won, J. G., Winker, D. M., Yoon, S. C., Dubovik, O., and McCormick, M. P.:  
14 Development of global aerosol models using cluster analysis of Aerosol Robotic Network  
15 (AERONET) measurements, Journal Of Geophysical Research-Atmospheres, J. Geophys.  
16 Res. 110: D10S14, doi: 10.1029/2004JD0048, 2005.

17 Paraskevopoulou, D., Liakakou, E., Gerasopoulos, E., Theodosi, C., & Mihalopoulos, N.  
18 (2014). Long-term characterization of organic and elemental carbon in the PM 2.5 fraction:  
19 the case of Athens, Greece. Atmospheric Chemistry and Physics, 14(23), 13313-13325.

20 Paur, R. J., and A. M. Bass. 1985. "The Ultraviolet Cross-Sections of Ozone: II. Results and  
21 Temperature Dependence." In Atmospheric Ozone, edited by C. S. Zerefos and A. Ghazi,  
22 611– 616. Dordrecht: Springer.

23 Petters, J. L., Saxena, V. K., Slusser, J. R., Wenny, B. N., and Madronich, S.: Aerosol single  
24 scattering albedo retrieved from measurements of surface UV irradiance and a radiative  
25 transfer model, Journal of Geophysical Research D: VOL. 108, NO. D9, 4288,  
26 doi:10.1029/2002JD002360, 2003.

27 Reuder, J., and H. Schwander, Aerosol effects on UV radiation in nonurban regions, J.  
28 Geophys. Res., 104(D4), 4065–4077, doi:10.1029/1998JD200072, 1999~~Reuder, J., and~~  
29 ~~Schwander, H.: Aerosol effects on UV radiation in nonurban regions, Journal of Geophysical~~  
30 ~~Research D: Atmospheres, 104, 4065–4077,~~

1 Russell, P. B., Bergstrom, R. W., Shinozuka, Y., Clarke, A. D., DeCarlo, P. F., Jimenez, J. L.,  
2 Livingston, J. M., Redemann, J., Dubovik, O., and Strawa, A.: Absorption Angstrom  
3 Exponent in AERONET and related data as an indicator of aerosol composition, *Atmospheric*  
4 *Chemistry And Physics*, 10, 1155-1169, 10.5194/acp-10-1155-2010, 2010.

5 Schuster, G. L., Dubovik, O., & Arola, A. (2016). Remote sensing of soot carbon – Part 1 :  
6 Distinguishing different absorbing aerosol species, 1565–1585. doi:10.5194/acp-16-1565-  
7 2016

8 [Smirnov, A., Holben, B. N., Eck, T. F., Dubovik, O., & Slutsker, I. \(2000\). Cloud-screening  
9 and quality control algorithms for the AERONET database. \*Remote Sensing of Environment\*,  
10 \*73\*\(3\), 337-349.](#)

11 Tanskanen, A., Lindfors, A., Määttä, A., Krotkov, N., Herman, J., Kaurola, J., Koskela, T.,  
12 Lakkala, K., Fioletov, V., Bernhard, G., McKenzie, R., Kondo, Y., O'Neill, M., Slaper, H.,  
13 den Outer, P., Bais, A. F., and Tamminen, J.: Validation of daily erythemal doses from Ozone  
14 Monitoring Instrument with ground-based UV measurement data, Validation of daily  
15 erythemal doses from ozone monitoring instrument with ground-based UV measurement  
16 data, *J. Geophys. Res.*, 112, D24S44, doi:10.1029/2007JD008830, 2007

17 Taylor, T. E., L'Ecuyer, T. S., Slusser, J. R., Stephens, G. L., and Goering, C. D.: An  
18 operational retrieval algorithm for determining aerosol optical properties in the ultraviolet, *J.*  
19 *Geophys. Res.*, 113, D03201, 10.1029/2007jd008661, 2008.

20 [Torres, O., A. Tanskanen, B. Veihelmann, C. Ahn, R. Braak, P. K. Bhartia, P. Veefkind, and  
21 P. Levelt \(2007\), Aerosols and surface UV products from Ozone Monitoring Instrument  
22 observations: An overview, \*J. Geophys. Res.\*, 112, D24S47, doi:10.1029/2007JD008809](#)

23 UNEP, Van der Leun, J. C., Tang, X., and Tevini, M.: Environmental effects of ozone  
24 depletion: 1998 assessment, *Journal of Photochemistry and Photobiology B: Biology*, 46,  
25 10.1016/s1011-1344(98)00195-x, 1998.

26 UNEP: Environmental effects of ozone depletion and its interactions with climate change:  
27 2002 assessment, executive summary, *Photochem. Photobio. S.*, 2, 1–4, 2003.

28 UNEP, Van Der Leun, J., Bornman, J. F., and Tang, X.: Environmental effects of ozone  
29 depletion and its interactions with climate change: 2006 Assessment, *Photochem. Photobiol.*  
30 *Sci.*, 2007, 6, 209-209, DOI: 10.1039/B700016B. 2007.

1 Van Weele, M., Martin, T. J., Blumthaler, M., Brogniez, C., Den Outer, P. N., Engelsen, O.,  
2 Lenoble, J., Mayer, B., Pfister, G., Ruggaber, A., Walravens, B., Weihs, P., Gardiner, B. G.,  
3 Gillotay, D., Haferl, D., Kylling, A., Seckmeyer, G., and Wauben, W. M. F.: From model  
4 intercomparison toward benchmark UV spectra for six real atmospheric cases, *Journal of*  
5 *Geophysical Research D: Atmospheres*, 105, 4915-4925, 2000.

6 WMO: Scientific Assessment of Ozone Depletion: 2002. Global Ozone Research and  
7 Monitoring Project - Report No. 47, Geneva, Switzerland, 498 pp, 2003.

8 Yu, H., Kaufman, Y. J., Chin, M., Feingold, G., Remer, L. A., Anderson, T. L., Balkanski, Y.,  
9 Bellouin, N., Boucher, O., Christopher, S., DeCola, P., Kahn, R., Koch, D., Loeb, N., Reddy,  
10 M. S., Schulz, M., Takemura, T., and Zhou, M.: A review of measurement-based assessments  
11 of the aerosol direct radiative effect and forcing, *Atmospheric Chemistry And Physics*, 6, 613-  
12 666, 2006.

13 Zerefos, C. S., Tourpali, K., Eleftheratos, K., Kazadzis, S., Meleti, C., Feister, U., Koskela,  
14 T., and Heikkilä, A.: Evidence of a possible turning point in solar UV-B over Canada, Europe  
15 and Japan, *Atmospheric Chemistry And Physics*, 12, 2469-2477, 10.5194/acp-12-2469-2012,  
16 2012.
